1 **Host genetic variants regulates CCR5 expression on immune cells: a study in people**  
2 **living with HIV and healthy controls**

3 Jéssica C. dos Santos<sup>a,1,\*</sup>, Zhenhua Zhang<sup>b,h,i,1</sup>, Louise E. van Eekeren<sup>a</sup>, Ezio T. Fok<sup>c</sup>, Nadira  
4 Vadaq<sup>a</sup>, Lisa van de Wijer<sup>a</sup>, Wouter A. van der Heijden<sup>a</sup>, Valerie A. C. M. Koeken<sup>a,h,i</sup>, Hans  
5 J.P.M. Koenen<sup>d</sup>, Musa Mhlanga<sup>c,e,f</sup>, Mihai G. Netea<sup>a,g</sup>, André J. van der Ven<sup>a</sup>, Yang Li<sup>a,h,i</sup>

6 <sup>a</sup>Department of Internal Medicine and Radboud Center for Infectious Diseases, Radboud  
7 University Medical Center, 6525 HP Nijmegen, the Netherlands; <sup>b</sup>Department of Genetics,  
8 University of Groningen, University Medical Center Groningen, 9700 RB Groningen, the  
9 Netherlands; <sup>c</sup>Epigenomics & Single Cell Biophysics Group, Department of Cell Biology,  
10 Radboud University, 6525 GA Nijmegen, the Netherlands; <sup>d</sup>Laboratory Medical  
11 Immunology, Department of Laboratory Medicine, Radboud University Medical Center,  
12 6525 HP Nijmegen, the Netherlands; <sup>e</sup>Department of Human Genetics, Radboud University  
13 Medical Center, 6525 GA Nijmegen, the Netherlands. <sup>f</sup>Radboud Institute for Molecular Life  
14 Sciences, 6525 GA Nijmegen, the Netherlands; <sup>g</sup>Department of Immunology and  
15 Metabolism, Life and Medical Sciences Institute, University of Bonn, Germany;  
16 <sup>h</sup>TWINCORE, Centre for Experimental and Clinical Infection Research, a joint venture  
17 between the Hannover Medical School and the Helmholtz Centre for Infection Research,  
18 Hannover, Germany; <sup>i</sup>Department of Computational Biology for Individualised Medicine,  
19 Centre for Individualised Infection Medicine (CiiM), a joint venture between the Helmholtz-  
20 Centre for Infection Research (HZI) and the Hannover Medical School (MHH), Hannover,  
21 Germany.

22 \*Correspondence: J.C. dos Santos  
23 Email: [jessica.dossantos@radboudumc.nl](mailto:jessica.dossantos@radboudumc.nl)

24 <sup>1</sup>J.C.S. and Z.Z. contributed equally to this work.

25  
26  
27  
28  
29  
30  
31  
32  
33  
34  
35  
36  
37  
38  
39  
40  
41  
42  
43

44 **Abstract**

45

46 C-C chemokine receptor 5 (CCR5) is the main HIV co-receptor affecting susceptibility and  
47 disease course. Quantitative trait loci (QTL) mapping analysis was performed to assess  
48 genetic variants associated with CCR5 expression on circulating immune cells in 209 PLHIV  
49 using ART and 304 healthy controls, all of Western European ancestry. The proportions of  
50 CCR5 positive cells and CCR5 mean fluorescence intensity (MFI) were assessed by flow  
51 cytometry in monocytes and CD4<sup>+</sup> and CD8<sup>+</sup> T cell subsets using flow cytometry. We  
52 identified the rs60939770, which is an intergenic variant in *cis*-region to CCR5 gene not in  
53 linkage disequilibrium with CCR5d32, related to the proportion of CCR5<sup>+</sup> memory T  
54 regulatory cells, both in PLHIV and healthy controls. Two genome-wide significant loci, in  
55 linkage equilibrium with CCR5d32, were found to be associated with CCR5 MFI of multiple  
56 subsets of mostly differentiated memory T cells in both groups. The expression of nearby  
57 chemokines receptors (CCR1, CCR2, CCR3, CCRL2), existing in the same the same  
58 topologically associating domain, were also influenced by these genetic variants.  
59 Furthermore, we show the genetic variants which modulate CCR5 surface expression affect  
60 the production of other inflammatory mediators, including monocyte- and lymphocyte-  
61 derived cytokines as well as CCL4 and IL-8. Our data indicate that the genetic regulation of  
62 CCR5 expression is cell-specific and affects the production of various inflammatory  
63 mediators.

64

65 **Author Summary**

66

67 CCR5 plays a important role in the acquisition of HIV and it is associated to immune  
68 activation in people living with HIV (PLHIV). Using samples of cohorts composed of healthy  
69 individuals and PLHIV, we sought to map genomic regions that influence CCR5 expression  
70 on monocytes and subsets of CD4<sup>+</sup> and CD8<sup>+</sup> cells. We identified distinct genetic variants  
71 that are associated with CCR5 cell proportions or mean fluorescence intensity in  
72 subpopulations of T cells with memory functions in both healthy and PLHIV. The genetic  
73 variants also influenced the expression of other nearby chemokine receptors and the  
74 production of inflammatory mediators. Thus, we demonstrated that the genetic regulation of  
75 CCR5 expression is cell-type specific and may impact HIV susceptibility and disease  
76 progression.

77

78

79

80

81

82

83

84

85

86

87

88

89

90

91

## 92 1. Introduction

93

94 CD4 receptor-mediated entry of human immunodeficiency virus-1 (HIV-1) requires binding  
95 to C-C chemokine receptor 5 (CCR5) or C-X-C chemokine receptor 4 (CXCR4) as a co-  
96 receptor (1). While CCR5 is the main co-receptor for HIV-1 entry, its expression levels on  
97 the surface of specific CD4<sup>+</sup> T cell populations have been shown to be associated with the  
98 response to treatment and disease progression in HIV infection (2). CCR5 ligands (CCL3,  
99 CCL4, CCL5 and CCL3L1) also play an important role in innate and adaptive immune  
100 responses, further highlighting the importance of CCR5 and its downstream signaling. As  
101 such, dysregulated CCR5 expression could contribute to non-AIDS associated  
102 comorbidities that become more prevalent in people living with HIV (PLHIV), despite highly  
103 effective long-term suppressive combination antiretroviral treatment (ART) (3).

104 Many studies have been identified genetic factors that influence HIV acquisition and  
105 progression (1). A consistent finding is a 32-base pair deletion in the open reading frame  
106 (ORF) of the CCR5 gene, resulting in a defective CCR5 that cannot emerge on the surface  
107 of the cell after translation (referred to as *CCR5Δ32* (rs333)). Heterozygous *CCR5Δ32*  
108 individuals have reduced surface levels of CCR5 allowing PLHIV to benefit from slower  
109 disease progression, while the complete absence of CCR5 on the cell surface due to a  
110 homozygous *CCR5Δ32* deletion can prevent infection by CCR5-tropic strains of HIV (4).  
111 Moreover, stem cell transplantation from a homozygous *CCR5Δ32* donor has led to  
112 functional cure of HIV in the infected recipient (5). These consequences of *CCR5Δ32*  
113 highlight the possible clinical impact of other genetic variants on CCR5 expression levels.

114 Previous studies have directly evaluated CCR5 genotypes in relation to HIV  
115 pathogenesis and overlooked genome-wide genetic variations associated with CCR5  
116 expression on immune cells targeted by HIV-1 (6, 7). These genotypes include specific  
117 single nucleotide polymorphisms (SNPs) in the CCR5 and CCR2 coding region that were  
118 grouped into seven phylogenetically distinct clusters known as the CCR5 human haplotypes  
119 (HH) A-G (6). The current evidence on the association between specific CCR5 haplotypes  
120 and CCR5 expression is scarce and contradictory (8, 9). Moreover, the link between  
121 genetics and CCR5 expression have not been studied for specific HIV-1 relevant cell  
122 subsets at different stages of differentiation. The latter is particularly important as terminally  
123 differentiated memory immune cells express higher levels of CCR5 than their naïve  
124 counterparts (10). This increase of CCR5 expression on CD4<sup>+</sup> T cells with memory functions  
125 has been described as a marker of disease progression, since optimal conditions for viral  
126 replication are provided by these subsets of cells (11). Thus, although several SNPs related  
127 to HIV pathogenesis are found in the CCR5 gene, it remains unknown whether genome-  
128 wide genetic variations on specific cell-types determine interindividual CCR5 expression  
129 levels in PLHIV with an intact CCR5 ORF.

130 In this study we aimed to conduct a in a genome-wide association study (GWAS)  
131 PLHIV to assess the contribution of host genetic variation on the cell surface expression of  
132 CCR5 and the proportion of CCR5-expressing circulating immune cell subsets. As one of  
133 the GWAS SNPs (rs11574435) mapped to the intronic region of a previously described,  
134 antisense transcribed sequence named *CCR5AS* (12), we also aimed to assess its effects  
135 more broadly by measuring, *CCR5* as well as *CCR5AS* and nearby genes in PLHIV.  
136 Furthermore, our findings in PLHIV were corroborated in an independent cohort (300BCG  
137 cohort) of healthy individuals (13).

138

139

## 140 2. Results

### 141 2.1 Characteristics of the study populations

142 Two independent cohorts of adults (18 years and above) with Western European  
143 ancestry were included in this study. This consisted of 209 people living with HIV (PLHIV)  
144 using long-term ART (200HIV) and 304 healthy individuals (300BCG study) (Fig. 1A). The  
145 average age of PLHIV and the healthy individuals was 52 years and 23 years, respectively,  
146 of which 91% and 43% respectively were males. In the PLHIV, HIV transmission routes  
147 included homosexual contact (157/209), heterosexual contact (39/209), intravenous drug  
148 use (IDU, 3/209), needle stick injury (1/209), and contaminated blood products (1/209). For  
149 the remaining 8/209 participants, the route of transmission was unknown. The PLHIV have  
150 the following HIV-specific characteristics: CD4 nadir: median 250  $10^6$  cells/L (IQR 230),  
151 latest CD4: median 660  $10^6$  cells/L (IQR 330), zenith HIV-RNA: median 100.000 copies/ml  
152 (IQR 345.591), and cART duration: median 6.61 years (IQR 7.70). A total of 67% (139/209)  
153 used an integrase inhibitor, 30% (63/209) non-nucleoside analogue and 15% (32/209) a  
154 protease inhibitor. The HIV-RNA viral load was beneath the detection limit in 203/209  
155 PLHIV.

### 156 2.2 Identifying genome-wide genetic determinants of CCR5 surface expression

157 To explore how genetics modulate the expression of CCR5 on the surface of  
158 different immune cell subsets, we conducted quantitative trait loci (QTL) mapping analysis  
159 using genotype data in the two independent cohorts. CCR5 expression on the surface of  
160 several subsets of immune cells was measured in both cohorts and expressed as the  
161 geometric mean of fluorescence intensity (MFI) and proportions of CCR5 positive cells (cell  
162 proportion (%)) (Fig. 1A, S1 Fig). The distributions of CCR5 MFI and proportions across the  
163 subpopulations of immune cells are shown in S3 Fig.

164 After testing the association between common variants (MAF > 0.1) and CCR5 MFI  
165 or cell proportions using a linear regression model with age and sex corrected, we identified  
166 five independent genome-wide significant loci ( $p < 5 \times 10^{-8}$ ) associated with CCR5 MFI or  
167 cell proportions in PLHIV (S1 Table). CCR5 MFI and cell proportions showed associations  
168 with three independent variants in the *cis*-region to the CCR5 locus (Fig. 1B) on  
169 chromosome 3. Moreover, two *trans*-loci variants associated with CCR5 MFI or cell  
170 proportions were located at chromosome 2 (S3 Fig). Interestingly, the majority of significant  
171 associations (75%) were found in relation to T cells with memory functions, suggesting the  
172 importance of genetics for CCR5 cell-surface expression in long-lasting populations of  
173 immune cells.

174 To validate these genetic associations and verify their specificity to PLHIV, we  
175 performed a QTL mapping analysis of the same measurements of the relevant immune cell  
176 subsets in an independent cohort of healthy controls (HC). We identified a common genetic  
177 loci that was associated with the proportions of CCR5<sup>+</sup>CD4<sup>+</sup> mTregs for both PLHIV and HC  
178 (Fig. 1C). The genetic variant associated with CCR5 MFI in PLHIV was also identified in HC  
179 in the same subsets of CD4<sup>+</sup> and CD8<sup>+</sup> T cells, except for CD8<sup>+</sup> central memory T cells in  
180 which the association was found in PLHIV only (Fig. 1D). Two additional genetic variants in  
181 the the *cis*-region of the CCR5 locus and one *trans*-loci variant were identified associated  
182 with both CCR5 MFI and cell proportions in subpopulations of CD4<sup>+</sup> and CD8<sup>+</sup> cells of HC  
183 only (S2 Table). Besides the validation of the common genetic associations in two

184 independent cohorts, our results using both cohorts of PLHIV and HC allowed the  
185 identification of genetic variants that are important for CCR5 surface expression in specific  
186 immune cells subpopulations of PLHIV (Fig. 2). As CCR5 is the major co-receptor of HIV  
187 in immune cells (1), these genetic variants might have a relevant influence on the disease  
188 outcome in PLHIV and susceptibility of acquiring HIV in healthy controls.

### 189 **2.3 *Cis*- and *trans*-genetic effects on CCR5 proportions in CD4<sup>+</sup> mTreg and total CD4<sup>+</sup>** 190 **T cells**

191 The strongest association (*cis*-SNP rs60939770, chromosome 3, P-value =  $4.29 \times$   
192  $10^{-16}$ ) was identified for the proportion of CCR5<sup>+</sup>CD4<sup>+</sup> mTreg cells in PLHIV (Fig. 3A). Of  
193 importance, these effects were replicated in the HC cohort at genome-wide significance (P-  
194 value =  $3.18 \times 10^{-10}$ ). PLHIV carrying at least one rs60939770-G allele had a significantly  
195 higher proportion of CCR5<sup>+</sup>CD4<sup>+</sup> mTreg cells than subjects homozygous for the A allele  
196 (Fig. 3B). The same genetic effect was also observed in the HC (Fig. 3C). The rs60939770  
197 SNP is an intergenic variant in *cis*-region to the *CCR5* gene and it is in a linkage  
198 disequilibrium (LD) with the rs1015164 SNP ( $R^2 = 0.6823$ ,  $D' = 0.8594$ , P-value < 0.0001).  
199 (Table S1). Our results reveal that the rs1015164 is strongly correlated to the the  
200 percentages of CD4<sup>+</sup> mTreg cells expressing CCR5 in PLHIV and HC (P-value <  $5 \times 10^{-8}$ ) (  
201 S4A-C Fig). Individuals with the rs1015164-A was shown to have higher proportion of  
202 CCR5<sup>+</sup>CD4<sup>+</sup> mTreg cells compared to rs1015164-G in both PLHIV and HC (S4B-D Fig).  
203 rs1015164 lies in the antisense long noncoding RNA *CCR5AS* and has previously been  
204 associated with increased CCR5 MFI surface expression in bulk memory CD4<sup>+</sup> T cells and  
205 effector memory CD4<sup>+</sup> T cells of healthy individuals (12). Given the previously reported  
206 effects of rs1015164 in CCR5 MFI expression, we tested the influence of rs1015164 on  
207 CCR5 MFI levels in our dataset. Due to the cellular subset resolution afforded by our study,  
208 we found CCR5 MFI levels to be most altered by this polymorphism in CD4<sup>+</sup> mTreg cells  
209 (S4E-G Fig). The rs1015164-A was associated with higher CCR5 MFI expression than  
210 rs1015164-G in CD4<sup>+</sup> mTreg cells of PLHIV and HC cells (P-value = < 0.05) (S4F-H Fig).  
211 Even though the rs60939770 and rs1015164 are in LD, we demonstrated that they have  
212 different effects on CCR5 expression, which rs60939770 modulates CCR5 cell proportions  
213 and the rs1015164 affects both proportions of positive cells and MFI. Collectively, these  
214 results suggested that the expression of CCR5 in CD4<sup>+</sup> mTreg cells of PLHIV and healthy  
215 controls is under *cis*-genetic regulation.

216 A *trans*-loci genetic variant, rs12467868 was also identified and associated with the  
217 percentage of CCR5<sup>+</sup>CD4<sup>+</sup> T cells (P-value =  $4.07 \times 10^{-8}$ ) in PLHIV only (Fig. 2, S1 Table).  
218 The rs12467868 SNP lies in the intron 3 of the *RPS27* gene, a coding ribosomal protein  
219 gene implicated in viral replication of DNA and RNA viruses (14).

### 220 **2.4 The genetic variants associated to CCR5 MFI are present in differentiated CD4<sup>+</sup>** 221 **and CD8<sup>+</sup> T cell subsets**

222 For CCR5 surface expression (measured as MFI), we identified a genetic  
223 association with rs11574435 SNP (P-value <  $5 \times 10^{-8}$ ) in the majority of both CD4<sup>+</sup> and CD8<sup>+</sup>  
224 T cell subsets of both PLHIV and HC (Fig. 2, S1 Table). In PLHIV, the rs11574435-CC  
225 genotype was associated with higher CCR5 MFI expression than individuals with TC  
226 genotypes in the subpopulations of CD4<sup>+</sup> and CD8<sup>+</sup> T cells (Fig. 4). Within the same locus,  
227 the rs71327064 SNP (P-value <  $6.22 \times 10^{-9}$ ) was identified to be associated with CCR5 MFI

228 expression in CD4<sup>+</sup> TEMRA cells (Fig. 2, S1 Table). Furthermore, these findings of both  
229 SNPs were replicated in the HC cohort with the same allelic direction (P-value < 0.05).

230 Confounding these associations, rs11574435 SNP were shown to be highly in LD  
231 with *CCR5d32* (rs333) ( $R^2 = 0.8423$ ,  $D' = 0.9591$ , P-value < 0.0001, European cohort of the  
232 1000 Genome Project). After performing a Fisher's exact test in order to study which of the  
233 alleles of the rs11574435 SNP was linked with the *CCR5d32*, we identified that the  
234 rs11574435-T allele was significantly linked with the presence of *CCR5d32* (odds ratio =  
235 0.004 and P-value <  $2 \times 10^{-16}$ ). In addition, the rs71327064 SNP, associated with CD4<sup>+</sup>  
236 TEMRA cells was also moderately linked to *CCR5d32* ( $R^2 = 0.3379$ ,  $D' = 0.9062$ , P-value <  
237 0.0001) (S1 Table).

238 The *CCR5d32* is a well-known causal variant affecting CCR5 expression. It is a  
239 structural variant that results in deletion of 32 base pairs of *CCR5* gene open reading frame  
240 and is associated with slower disease progression in PLHIV (5). The effects of this deletion  
241 in HIV susceptibility have been attributed to reduced expression of a functional CCR5  
242 receptor (15). We therefore assessed the presence of *CCR5d32* in PLHIV and its effect on  
243 the CCR5 expression of the various cell subsets. A heterozygous (WT/delta32) phenotype  
244 for *CCR5d32* was found in 18,8% ( $n=40$ ) of PLHIV, whereas 81,2% ( $n=173$ ) did not have  
245 the deletion (WT/WT) (S5 Fig). With the exception of nTregs, all T cell subsets and  
246 monocytes from PLHIV carrying the WT/delta32, expressed significantly lower CCR5 MFI  
247 than those which are WT/WT PLHIV (Wilcoxon Test, P-value < 0.05) (S6 Fig). Moreover,  
248 the rs333 also influenced CCR5 proportions as subpopulations of CD4<sup>+</sup> and CD8<sup>+</sup> T cells of  
249 WT/delta32 PLHIV showed lower CCR5 proportions than WT/WT. No differences in CCR5  
250 proportions were observed for nTregs and monocytes (S7 Fig).

251 To evaluate whether the SNPs we identified (rs11574435 and rs71327064) were  
252 independently causal to decreased CCR5 MFI in PLHIV, we stratified the six individuals  
253 carrying only the rs11574435 SNP and not *CCR5d32*. We found no significant differences  
254 in CCR5 MFI expression on CD4<sup>+</sup> T cells, nor in the majority of CD8<sup>+</sup> T subsets and  
255 monocytes of PLHIV carriers of rs11574435-TC without *CCR5d32* (WT/WT) compared to  
256 those carrying neither rs11574435 nor *CCR5d32*. CD8<sup>+</sup> effector memory T cells was the  
257 exception, which a significant increase in CCR5 MFI expression of PLHIV carrying the  
258 rs11574435-TC was observed in comparison to the individuals rs11574435-CC and  
259 *CCR5d32* (WT/WT) (S8 Fig). We applied the same stratification strategy to evaluate the  
260 effects of CCR5 MFI in CD4<sup>+</sup> TEMRA cells of individuals carrying the rs71327064 SNP only  
261 in comparison to individuals with neither rs71327064 SNP nor *CCR5d32*. We observed that  
262 in the absence of *CCR5d32*, CCR5 MFI expression was significantly lower in individuals  
263 carrying the rs71327064 SNP only than in individuals with neither rs71327064 nor *CCR5d32*  
264 (Wilcoxon Test, P-value < 0.05) (S9 Fig). Together, these results suggest that *CCR5d32* is  
265 playing the major effect in CCR5 MFI expression in relation to rs11574435 in the majority of  
266 on CD4<sup>+</sup> and CD8<sup>+</sup> T subsets evaluated, whereas the rs71327064 may modulate CCR5 MFI  
267 in CD4<sup>+</sup> TEMRA cells independently of the presence of *CCR5d32*. In addition, PLHIV  
268 carrying the combination of the rs11574435 and rs71327064 SNPs together with the  
269 *CCR5d32* (WT/delta32) had a remarkable decrease in CCR5 MFI expression in comparison  
270 to the individuals without any of the three genetic variants (Wilcoxon Test, P-value < 0.05).  
271 These findings shows that the identified SNPs exert their functions in a cell-type specific  
272 manner, a feature that was only possible to explore due the detailed assessment of CCR5  
273 expression on the surface of different subsets of T cells.

## 274 **2.5 rs60939770 influence the mRNA expression of other nearby chemokines** 275 **receptors within the CCR5 gene cluster**

276 We performed *cis*-expression QTL (eQTL) mapping using RNA sequencing data  
277 from whole blood samples of healthy individuals (16). The results showed that the genetic  
278 variants we identified in the *cis*-region to CCR5 locus is not only associated with the  
279 expression of CCR5 but also influences the expression of other nearby chemokines genes  
280 (Fig. 2, S1 Table). Transcription of coregulated genes occurs in the context of long-range  
281 chromatin interactions, which genes and transcriptional regulatory elements, such as long  
282 noncoding RNAs are brought into close proximity to regulate protein-coding gene  
283 expression (17). We sought to map the three-dimensional chromatin structures, known as  
284 topologically associating domain (TAD) of CCR5 locus, and test which genes within this  
285 genomic neighbourhood may be subjected to such long-range co-regulatory mechanisms  
286 and investigate the correlations of long-range contact with transcription in PLHIV. Publicly  
287 available genome-wide chromosome conformation capture (Hi-C) data obtained from K562  
288 cells revealed CCR1, CCR3, CCR2, CCRL2, LTF, and CCR5AS located within the same  
289 TAD as CCR5 (Fig. 5A). In order to understand the co-regulatory relationship between these  
290 genes at the transcriptional level, we next profiled the expression of CCR1, CCR3, CCR2,  
291 CCRL2, LTF, CCR5, and CCR5AS transcripts by qPCR on whole blood samples of  
292 individuals from PLHIV. At baseline, without the presence of any stimulants, we observed a  
293 similar pattern of expression in between the CCR5 and the nearby genes identified in the  
294 TAD (Fig. 5B, Spearman's correlation, P-value < 0.05).

295 As the eQTL analysis of candidate genes performed in whole blood of healthy  
296 individuals revealed that the rs60939770 is associated with the genes located within the  
297 CCR5 TAD (Fig. 2), we next assessed the effects of rs60939770 in modulating the  
298 expression of CCR1, CCR3, CCR2, CCRL2, LTF, CCR5, as well as CCR5AS in whole blood  
299 of PLHIV. PLHIV carrying the rs60939770-GG genotype had lower expression of CCR1,  
300 CCR3, CCR2, CCRL2, LTF, CCR5 mRNA and CCR5AS RNA in comparison to the  
301 individuals rs60939770-GA (Wilcoxon Test, P-value < 0.05 (Fig. 5C). We also evaluated the  
302 effects of rs11574435 and in modulating the expression of CCR5AS, CCR5 and nearby  
303 genes in PLHIV carrying the different SNP genotypes. In subjects with the rs11574435-TC  
304 genotype, a significant increase (Wilcoxon Test, P-value < 0.05) in CCR5, CCR3, CCRL2  
305 and LTF mRNA expression in comparison to rs11574435-CC. Although no significant  
306 differences were observed for CCR5AS, CCR1 and CCR2, there was a tendency to higher  
307 expression in TC genotypes (S10 Fig). Together, these findings suggest that the *cis*-genetic  
308 regulators of CCR5 that lead to the modulation of CCR5 surface expression (measured as  
309 cell proportions or MFI) also modulate mRNA expression of CCR5 and other chemokines  
310 receptors within the same locus.

311

## 312 **2.6 The genetic regulation of CCR5 expression influences the cytokine production** 313 **capacity of circulating immune cells**

314 CCR5 expression is known to facilitate the chemotaxis of immune cells to sites of  
315 infection or inflammation, a process that results in amplification of the inflammatory  
316 responses (18). We therefore tested whether the SNPs that are associated with CCR5  
317 surface expression (rs60939770, rs1015164, rs71327064, rs11574435 and CCR5delta32)  
318 were related with the production capacity of inflammatory cytokines and chemokines after  
319 ex vivo stimulation of PBMCs in our 200HIV cohort (19). We found that the rs60939770 is  
320 associated with the production of the innate immune cells-derived soluble mediators, IL-1 $\beta$ ,

321 IL6, TNF and monocyte chemoattractant protein-1 (MCP-1) in PLHIV (nominal P-value <  
322 0.05). Of note, despite the fact of rs1015164 being in LD with rs60939770, we demonstrated  
323 that in terms of functions these two SNPs differ, as rs1015164 was associated with the  
324 production of the TNF and IFN $\gamma$  (Fig. 6A). When we further assessed the SNPs identified to  
325 be associated with CCR5 MFI levels, we observed that the rs71327064 was associated with  
326 the production of both IL-6 and IFN $\gamma$ . Moreover, the rs11574435 SNP was significantly  
327 associated with the production of both innate and adaptive inflammatory mediators of  
328 PBMCs of PLHIV, including MCP-1, IL-1 $\beta$ , TNF, IL8, IL6 and IFN $\gamma$ , IL17, respectively (Fig.  
329 6A). In the HC cohort, rs11574435 SNP was also associated with the levels of IFN $\gamma$  by  
330 PBMCs (Fig. 6B). Of importance, *CCR5delta32* was also shown to modulate the production  
331 of MCP-1, IL-1 $\beta$ , IL8, IL6 and IFN $\gamma$  and IL-22.

332 Next, we tested the association between the identified SNPs and the concentrations  
333 of circulating inflammatory mediators both in PLHIV and in HC. We observed that the  
334 rs11574435 is associated with the secretion of beta-chemokines including the C-C Motif  
335 Chemokine Ligand 4 (CCL4), which together with CCL3 and CCL5 are known as anti-CCR5  
336 factors (20). These chemokines downregulate or block the receptors CCR5, CCR1 and  
337 CCR2 resulting in HIV infection inhibition (21). Besides CCL4, rs11574435 SNP was  
338 associated with the levels of the chemokines, MCP-3, CCL23, CCL11 as well as the  
339 production of SCF, IL17C, CD8A in PLHIV (Fig. 6A). *CCR5delta32* was also related to the  
340 production of CCL4 and SCF, but not with MCP-3, CCL23, CCL11 or IL17C, CD8A. In  
341 addition, *CCR5delta32* was associated with the production of caspase 8. In the HC cohort,  
342 rs11574435 SNP is also associated with circulating CCL4 concentrations (Fig. 6B). Thus,  
343 despite the co-occurrence of *CCR5delta32* and rs11574435 as the main genetic factors  
344 responsible for the modulation of CCR5 MFI expression, these genetic variants alter the  
345 production of soluble mediators in a different manner. Our findings indicate that the  
346 differences in CCR5 expression is associated with the levels of immune activation in PLHIV,  
347 which may have an impact on the pathogenesis of HIV infection.

348

### 349 3. Discussion

350 In the present study, we identified three novel common genetic loci that were  
351 associated with cell-type-dependent surface expression of CCR5 in two independent  
352 cohorts from Western European descent, one consisting of virally suppressed PLHIV, the  
353 other cohort including healthy individuals. We also show that these genetic variants not only  
354 affect CCR5 expression but also other genes that are part of the same topologically  
355 associating domain in the CCR5 locus. Finally, our results indicate that these genetic  
356 variants cause altered inflammatory responses.

357 The strongest genome-wide significant locus was the rs60939770 variant in the *cis*-  
358 region of CCR5 locus, which was found to be specifically associated with the percentage of  
359 CCR5<sup>+</sup>CD4<sup>+</sup> mTregs, both in PLHIV and in healthy controls. Tregs cells are important to  
360 control HIV replication by reducing T-cell activation, which decreases the availability of  
361 target cells for HIV (22). Moreover, in agreement with our findings, previous studies have  
362 shown that memory T cells express higher CCR5 in comparison to naive T cells (23).  
363 Memory Tregs may alleviate tissue damage during pro-inflammatory conditions and CCR5  
364 expression on these cells may direct them into inflamed tissues (24). The precise role of  
365 Tregs in the HIV infections remains an extensive topic of discussion. The rs60939770 SNP  
366 is not correlated with the well-described *CCR5delta32* (rs333), but with another common  
367 variant, rs1015164, also in the *cis*-region of CCR5 locus. The latter variant is linked with HIV



368 progression parameters such as viral load and CD4<sup>+</sup> T cell counts (12, 25). Our data  
369 indicate that CCR5 expression of mTregs is also affected by rs1015164, therefore further  
370 investigation will be needed to determine which of the two genetic variants from this locus  
371 is causal for CCR5 modulation.

372         Apart from analyzing whether or not immune cells express CCR5, we also assessed  
373 the intensity of CCR5 surface expression. Here we found two different genetic variants,  
374 rs11574435 and rs71327064, associated with the MFI of surface CCR5 molecules in  
375 subpopulations of CD4<sup>+</sup>, CD8<sup>+</sup> T cells and CD4<sup>+</sup> TEMRA cells, respectively. rs11574435 is  
376 in LD with *CCR5delta32* and it is located in a transcript called *CCR5AS*. CCR5 expression  
377 is low in naïve cells, but with cell differentiation as well as stimulation, the surface expression  
378 of CCR5 on immune cells increases (23, 26). This is in line with our data which shows that  
379 the rs11574435 SNP and *CCR5delta32* variants associate with CCR5 MFI expression in  
380 mostly differentiated CD4<sup>+</sup> and CD8<sup>+</sup> T cells. Interestingly, unlike rs11574435, the  
381 *CCR5delta32* affected CCR5 MFI expression also in naive T cells as well as monocytes.  
382 Epigenetic factors may play a role in this, as the DNA methylation content of *CCR5* is  
383 different in naive vs differentiated cells (10). Of note, among PLHIV we observed that not all  
384 subjects carry both rs11574435 and *CCR5delta32* and we were able to study their effects  
385 separately. Our results indicate that rs11574435 has no influence in CCR5 surface  
386 expression, which we have shown to be attributed to the effects of *CCR5delta32*. This  
387 differed when we looked into the effects of rs71327064, which was identified associated  
388 with CCR5 MFI on CD4<sup>+</sup> TEMRA. The presence of rs71327064 in CD4<sup>+</sup>TEMRA led to  
389 decreased CCR5 MFI surface expression. CD4<sup>+</sup>TEMRA cells are differentiated effector  
390 memory CD4 cells that highly express CCR5, correlate with CD4<sup>+</sup> T cells numbers but are  
391 resistant to R5-tropic HIV-1 (27). CD4<sup>+</sup> TEMRA may therefore be a resistant subset of T  
392 cells to HIV infection, which might have a beneficial role during HIV infections.

393         One may question whether CCR5 expression intensity is as relevant for HIV  
394 susceptibility, compared to the presence or absence of CCR5 on the cell surface. CD4 and  
395 CCR5 should co-localize so HIV can infect the cell. It has been shown, however, that CCR5,  
396 CXCR4 and CD4 are predominantly present on microvilli in different cell types, including T  
397 cells and macrophages and that these microclusters of CD4 and chemokine receptors were  
398 frequently separated by less distance than the diameter of an HIV virion (28), indicating that  
399 cells with low CCR5 expression may still be susceptible for HIV infection. Although our  
400 findings concerning the genetic modulation of CCR5 expression in the different cell subtypes  
401 are new, we have not investigated whether this would also be relevant for the establishment  
402 or susceptibility of HIV infections. Moreover, long-lasting subsets of T cells, including  
403 memory T cells expressing CCR5, are known to host HIV during latency, named also as  
404 viral reservoirs (29). Therefore, the genetic variants we identified associated to T cells with  
405 memory functions might have important implication in the development of persisting viral  
406 reservoirs.

407         Memory T cells are known to be the main responders to beta-chemokines, and high  
408 expression of CCR5 on quiescent cells prompt them to be highly responsive to chemokine  
409 gradients at sites of immune and inflammatory responses (30, 31). Therefore, cells  
410 expressing higher levels of CCR5 can amplify inflammation favoring the development of  
411 non-AIDS comorbidities such as cardiovascular diseases (32). Importantly, we have  
412 demonstrated that rs60939770 and rs11574435 were not only associated with the  
413 proportions of CCR5 positive cells and MFI on the surface of memory CD4<sup>+</sup> and CD8<sup>+</sup> T  
414 cells, but also with *CCR5* mRNA levels and the expression of other nearby chemokines  
415 receptors (*CCR1*, *CCR2*, *CCR3*) which are part of the same TAD. Of note, similar to CCR5,

416 CCR2 has been described to enhance HIV infection (33). As the rs60939770 and  
417 rs11574435 SNPs are located within non-coding regions of the genome, it is likely that all  
418 chemokines within the same TAD share a common regulator which influences their  
419 expression in a similar manner. Also, as these regulators are stimulus and cell-type specific  
420 (34), it is worthy considering that the transitional state of naïve T to mature memory cells  
421 trigger the induction of such elements leading to the modulation of CCR5 expression. We  
422 have shown that genetic variants might play a role in the expression of these regulators,  
423 however further studies are required to explore the relationship of these non-coding  
424 transcripts and the expression of CCR5 and other chemokine receptors.

425 Similar effects observed for rs11574435 were seen for the individuals carrying the  
426 *CCR5delta32*. The *CCR5delta32* has been previously associated with differential  
427 expression of chemokine receptors coding genes, for example *CXCR2*, *CCRL2*, as well as  
428 genes involved in T cell activation (CD6) and maturation (CD7) (35). In addition, we have  
429 demonstrated that rs11574435 as well as *CCR5delta32* are related to the production of  
430 other soluble factors including chemokines and inflammatory cytokines. Previous studies  
431 have indeed shown that CCR5 is a cell surface signaling receptor that plays a role in  
432 activation of inflammatory genes (36). The chemokines CCL3, CCL4, and CCL5/RANTES,  
433 known as CCR5 ligands, may protect CD4 T cells from HIV infection (20). Of note, CCL5  
434 and CCL4 also bind to different chemokine receptors (37). Here we observed that  
435 rs11574435 and *CCR5delta32* modulate the production of CCL4 in PLHIV. Moreover,  
436 decreased CCR5 surface expression triggered the increased *CCR5* mRNA expression likely  
437 due to feedback mechanisms. Altogether, our data suggest that certain genetic variants do  
438 not only affect CCR5 expression levels, but also production of chemokines, which may  
439 directly impact viral entry or modulate immune responses associated with HIV pathogenesis  
440 including non-AIDS comorbidities.

441 The current study has several limitations. First, despite large sample sizes in two  
442 cohorts, there is a limited power in detection of small genetic effects. Second, a single  
443 monoclonal anti-CCR5 antibody (2D7) was used to detect CCR5 and certain isoforms and  
444 CCR5 conformations may have not been recognized by this antibody (38). However,  
445 compared to other antibodies, 2D7 probably reacts best with conformations of CCR5 that  
446 are relevant to HIV-1 entry (39). Third, we did not evaluate the transcription factor FoxP3 to  
447 phenotype regulatory T cells. On the other hand, we have systematically compared the  
448 individuals from both PLHIV and HC cohorts in the same manner using other additional  
449 marks including CD25 and CD45RA for the assessment of naive and memory status (40).  
450 In addition, we have shown comparable results in between Tregs indentified using  
451 FoxP3<sup>+</sup>Helios<sup>+</sup> and CD25 (19).

452 In summary, the results presented herein indicate that genetic factors contribute to  
453 the interindividual variability of CCR5 surface expression in different subsets of immune  
454 cells of peripheral blood of both PLHIV and healthy controls of European ancestry.  
455 Furthermore, we show that the expression of certain chemokines (CCL4) chemokines  
456 receptors (*CCR1*, *CCR2*, *CCR3*, *CCRL2*), which are part of the same topologically  
457 associating domain, are also affected by these genetic factors.

## 458 4. Methods

459 **4.1 Ethics.** The study protocols of the 200 HIV pilot study and 300BCG were approved by  
460 the Medical Research Ethical Committee Oost-Nederland (ref. 42561.091.122 and

461 NL58553.091.16, respectively) and conducted in accordance with the principles of the  
462 Declaration of Helsinki. All study participants provided written informed consent.

463 **4.2 Study population.** The volunteers of this study are part of the HFGP  
464 ([www.humanfunctionalgenomics.org](http://www.humanfunctionalgenomics.org)) (33). Between 14 December 2015 and 6 February  
465 2017, individuals living with HIV were recruited from the HIV clinic of Radboud university  
466 medical center, the Netherlands. Inclusion criteria were Dutch/Western-European ethnicity,  
467 age  $\geq 18$  years, receiving cART  $> 6$  months, and latest HIV-RNA levels  $\leq 200$  copies/ml.  
468 Exclusion criteria were: signs of acute or opportunistic infections, antibiotic use  $< 1$  month  
469 prior to study visit, and active hepatitis B/C. General baseline characteristics of PLHIV  
470 including CD4 Nadir and HIV RNA Zenith were described previously (19). The healthy  
471 individuals were included in the 300BCG study between April 2017 and June 2018 in the  
472 Radboud university medical center, the Netherlands. Exclusion criteria were use of systemic  
473 medication other than oral contraceptives or acetaminophen, use of antibiotics 3 months  
474 before inclusion, and any febrile illness 4 weeks before participation (13).

475 **4.3 Genotypes, imputation, and quality control.** For the PLHIV cohort, the genotyping,  
476 imputation, and quality control were described previously (41). In addition, for the healthy  
477 individuals, the genotyping, imputation, and quality control were performed as in the  
478 previous study (42).

479 **4.4 QTL mapping.** Firstly, the immune phenotypes (cell proportions and CCR5 levels) were  
480 transformed using inverse-normal transformation. Then, we used the R/MatrixEQTL  
481 package (43) to conduct the QTL mapping for the geometric mean of fluorescence intensity  
482 of CCR5 protein and CCR5 positive cell proportion in PLHIV and HC, respectively. We used  
483 a linear regression model with age and sex as co-variables. To evaluate the inflation of the  
484 summary statistics, we calculate the genomic inflation factor for each association analysis:  
485 lambda values vary between 0.980 and 1.017 (median = 1.0045, mean = 1.0018, stdev =  
486 0.0069). Finally, we used  $P\text{-value} < 5 \times 10^{-8}$  as the genome-wide significant threshold to  
487 select SNPs for downstream analysis. To visualize the identified association signals, we  
488 used circus (44) (v 0.69, Perl 5.028001) package to show the Manhattan plot of analysis  
489 results along with the genome coordination only for chromosome 3. The hierarchical tree  
490 from the clustering analysis of immune cell proportions is plotted using the R/ggtree (45)  
491 (v1.8.2) package powered by BioConductor (v3.10). To investigate the genomic context  
492 around genome-wide significant associations, summary statistics for each phenotype were  
493 uploaded to the LocusZoom (46) server to visualize regional QTL mapping scan results,  
494 using hg19 and 1000 Genomes Nov 2014 EUR as reference genome and for LD calculation,  
495 respectively. Manhattan plot and Q-Q plot for each association analysis were generated by  
496 package qqman using default parameter settings. Analysis using MatrixEQTL and qqman  
497 were performed using R language (v3.6.0) and the in-house scripts for preprocessing using  
498 Python (v3.7.0) language are hosted on GitHub [https://github.com/zhenhua-](https://github.com/zhenhua-zhang/qtl_mapping_pipeline)  
499 [zhang/qtl\\_mapping\\_pipeline](https://github.com/zhenhua-zhang/qtl_mapping_pipeline).

500 **4.5 Antibodies and flow cytometry.** Flow cytometry analyses were conducted to assess  
501 CCR5 expression levels on several subsets of circulating immune cells (S1 Fig). Pre-  
502 processing stages including cell-processing and staining were similarly performed and by  
503 the same personnel in PLHIV and healthy controls. Venous blood was collected in sterile  
504 EDTA tubes. Details regarding cell processing and staining were described previously (47).

505 A Sysmex XN-450 automated hematology analyzer (Sysmex Corporation, Kobe, Japan)  
506 was used for determination of cell counts and to calculate absolute numbers of CD45+ white  
507 blood cell (WBC) counts as measured by flow cytometry. Methods, S3 Table shows the  
508 fluorochrome conjugates and clone identity of the antibodies. Flow cytometry data were  
509 acquired using a 10-color Navios flow cytometer (Beckman Coulter) and the Kaluza Flow  
510 Cytometry software (Beckman Coulter, version 2.1). Different subsets of immune cells were  
511 identified by sequential manual gating (S11 Fig).

512 **4.6 Molecular genotyping of CCR5d32**. Whole blood samples of PLHIV of the 200 HIV  
513 pilot study collected in EDTA tubes (BD Vacutainer) were used for genomic DNA extraction.  
514 The assessment of the region of the CCR5 gene containing the d32 deletion was adapted  
515 from (48). Primer sequences are listed in Methods, S4 Table. The PCR reactions were  
516 prepared using the 5X Q5 buffer, 10 mM dNTPs, Q5 High-Fidelity DNA Polymerase (New  
517 England Biolabs, Inc) and 10 uM forward and reverse primers. 50 ng of DNA was used as  
518 template. The PCR protocol consisted of 1 cycle of 98°C for 30s, 35 cycles of 98°C for 10s,  
519 62°C - 10s, 72°C - 10s and 1 cycle of 72°C for 2min. Fragments obtained from PCR were  
520 separated in 2% agarose gel containing ethidium bromide for visualization.

521 **4.7 RNA isolation and quantitative real time-PCR**. RNA was extracted from the whole  
522 blood of PLHIV of the 200 HIV pilot study using the QIAGEN PAXgene Blood RNA extraction  
523 kit (QIAGEN, Netherlands) according to the instructions of the manufacturer. Subsequently,  
524 RNA was reversely transcribed into cDNA by using iScript (Bio-Rad, Hercules, CA, USA).  
525 Diluted cDNA was used for qPCR that was done by using the StepOnePlus sequence  
526 detection systems (Applied Biosystems, Foster City, CA, USA) with SYBR Green Mastermix  
527 (Applied Biosystems). The mRNA and RNA relative expression analysis was done with the  
528 2<sup>-dCt</sup> method and normalized against the housekeeping gene RPL37A. Primer sequences  
529 are listed in Methods, S4 Table.

530 **4.8 PBMCs stimulation experiments and plasma proteomics**. Venous blood was  
531 collected in EDTA tubes (BD Vacutainer) and PBMCs were obtained by density  
532 centrifugation over Ficoll-Paque (VWR, Amsterdam, the Netherlands). Freshly isolated  
533 PBMCs (0.5 million cells/well) were incubated with different stimuli including bacterial  
534 (*Staphylococcus aureus*, *M. tuberculosis*, *Streptococcus pneumoniae*, *Coxiella burnetii*,  
535 *Salmonella enteritidis*, *Salmonella typhimurium*), fungal (*Cryptococcus gattii*, *Candida*  
536 *albicans* hyphae and yeast) and other relevant antigens (Poly:IC (100 ug/mL - Invivogen;  
537 TLR3 ligand), *E. coli* LPS (1 and 100 ng/mL - Sigma; TLR4 ligand) and Pam3Cys, (10 ug/mL  
538 - EMC microcollections; TLR2 ligand)), in round-bottom 96-well plates (Greiner Bio-One,  
539 Frickenhausen, Germany) at 37°C and 5% CO<sub>2</sub> in the presence of 10% human pooled  
540 serum for lymphocyte-derived cytokines assessment. The concentration of the mentioned  
541 bacterial and fungal stimuli are described previously (49). Supernatants were stored at -  
542 20°C. Levels of the monocytes-derived cytokines (TNF, IL-1β, IL-6) as well as chemokines  
543 (MCP-1, IL-8) were measured in the supernatants after 24 hours incubation. Levels of  
544 lymphocyte-derived cytokines (IFNγ, IL-17) were determined after 7 days (PeliKine  
545 Compact or DuoSet ELISA, R&D Systems). Baseline inflammatory plasma markers from  
546 both cohorts, 200HIV pilot study and 300BCG, were measured by targeted proteomics as  
547 applied by the commercially available Olink Proteomics AB (Uppsala Sweden) Inflammation  
548 Panel (92 inflammatory proteins), using a Proceek © Multiplex Proximity extension assay.  
549 Expression levels were calculated as described by Koeken et al 2020 (13).

550

## 551 Acknowledgments

552 The authors thank all volunteers from the Radboud University Medical Centre  
553 (Radboudumc) for participation in the study. Z.Z. is supported by a joint fellowship from the  
554 University Medical Center Groningen and China Scholarship Council (CSC201706350277)  
555 and the Singh-Chhatwal-Postdoctoral Fellowship at the Helmholtz Centre for Infection  
556 Research. We thank the UMCG Genomics Coordination center, the UG Center for  
557 Information Technology, and their sponsors BBMRI-NL & TarGet for storage and compute  
558 infrastructure. Y.L. was supported by an ERC Starting Grant (948207) and the Radboud  
559 University Medical Centre Hypatia Grant (2018) for Scientific Research. MGN was  
560 supported by an ERC Advanced Grant (833247) and a Spinoza Grant of the Netherlands  
561 Organization for Scientific Research

562

## 563 References

564

- 565 1. A. Brelot, L. A. Chakrabarti, CCR5 Revisited: How Mechanisms of HIV Entry  
566 Govern AIDS Pathogenesis. *J Mol Biol* **430**, 2557-2589 (2018).
- 567 2. A. Gervaix *et al.*, Response to treatment and disease progression linked to CD4+ T  
568 cell surface CC chemokine receptor 5 density in human immunodeficiency virus type  
569 1 vertical infection. *J Infect Dis* **185**, 1055-1061 (2002).
- 570 3. J. van Lunzen, How will CCR5 antagonists influence the recommendations for the  
571 antiretroviral treatment of HIV-1 infection. *Eur J Med Res* **12**, 435-440 (2007).
- 572 4. R. Liu *et al.*, Homozygous defect in HIV-1 coreceptor accounts for resistance of some  
573 multiply-exposed individuals to HIV-1 infection. *Cell* **86**, 367-377 (1996).
- 574 5. G. Hutter *et al.*, Long-term control of HIV by CCR5 Delta32/Delta32 stem-cell  
575 transplantation. *N Engl J Med* **360**, 692-698 (2009).
- 576 6. E. Gonzalez *et al.*, Race-specific HIV-1 disease-modifying effects associated with  
577 CCR5 haplotypes. *Proc Natl Acad Sci U S A* **96**, 12004-12009 (1999).
- 578 7. A. Mangano *et al.*, Concordance between the CC chemokine receptor 5 genetic  
579 determinants that alter risks of transmission and disease progression in children  
580 exposed perinatally to human immunodeficiency virus. *J Infect Dis* **183**, 1574-1585  
581 (2001).
- 582 8. S. Z. Jaumdally *et al.*, CCR5 expression, haplotype and immune activation in  
583 protection from infection in HIV-exposed uninfected individuals in HIV-  
584 serodiscordant relationships. *Immunology* **151**, 464-473 (2017).
- 585 9. A. C. Picton, M. Paximadis, C. T. Tiemessen, CCR5 promoter haplotypes  
586 differentially influence CCR5 expression on natural killer and T cell subsets in  
587 ethnically divergent HIV-1 uninfected South African populations. *Immunogenetics*  
588 **64**, 795-806 (2012).
- 589 10. G. G. Gornalusse *et al.*, Epigenetic mechanisms, T-cell activation, and CCR5  
590 genetics interact to regulate T-cell expression of CCR5, the major HIV-1 coreceptor.  
591 *Proc Natl Acad Sci U S A* **112**, E4762-4771 (2015).
- 592 11. V. Monceaux *et al.*, CD4+ CCR5+ T-cell dynamics during simian immunodeficiency  
593 virus infection of Chinese rhesus macaques. *J Virol* **81**, 13865-13875 (2007).
- 594 12. S. Kulkarni *et al.*, CCR5AS lncRNA variation differentially regulates CCR5,  
595 influencing HIV disease outcome. *Nat Immunol* **20**, 824-834 (2019).
- 596 13. V. A. Koeken *et al.*, BCG vaccination in humans inhibits systemic inflammation in a  
597 sex-dependent manner. *J Clin Invest* **130**, 5591-5602 (2020).

- 598 14. J. A. Fernandez-Pol, Conservation of multifunctional ribosomal protein  
599 metallopanstimulin-1 (RPS27) through complex evolution demonstrates its key role  
600 in growth regulation in Archaea, eukaryotic cells, DNA repair, translation and viral  
601 replication. *Cancer Genomics Proteomics* **8**, 105-126 (2011).
- 602 15. M. M. Lederman, A. Penn-Nicholson, M. Cho, D. Mosier, Biology of CCR5 and its  
603 role in HIV infection and treatment. *JAMA* **296**, 815-826 (2006).
- 604 16. U. Vosa *et al.*, Large-scale cis- and trans-eQTL analyses identify thousands of genetic  
605 loci and polygenic scores that regulate blood gene expression. *Nat Genet* **53**, 1300-  
606 1310 (2021).
- 607 17. S. Fanucchi, Y. Shibayama, S. Burd, M. S. Weinberg, M. M. Mhlanga, Chromosomal  
608 contact permits transcription between coregulated genes. *Cell* **155**, 606-620 (2013).
- 609 18. G. Martin-Blondel, D. Brassat, J. Bauer, H. Lassmann, R. S. Liblau, CCR5 blockade  
610 for neuroinflammatory diseases--beyond control of HIV. *Nat Rev Neurol* **12**, 95-105  
611 (2016).
- 612 19. L. Van de Wijer *et al.*, The Architecture of Circulating Immune Cells Is Dysregulated  
613 in People Living With HIV on Long Term Antiretroviral Treatment and Relates With  
614 Markers of the HIV-1 Reservoir, Cytomegalovirus, and Microbial Translocation.  
615 *Front Immunol* **12**, 661990 (2021).
- 616 20. S. F. Abdelwahab *et al.*, HIV-1-suppressive factors are secreted by CD4+ T cells  
617 during primary immune responses. *Proc Natl Acad Sci U S A* **100**, 15006-15010  
618 (2003).
- 619 21. E. Guan, J. Wang, G. Roderiquez, M. A. Norcross, Natural truncation of the  
620 chemokine MIP-1 beta /CCL4 affects receptor specificity but not anti-HIV-1 activity.  
621 *J Biol Chem* **277**, 32348-32352 (2002).
- 622 22. J. Nilsson *et al.*, HIV-1-driven regulatory T-cell accumulation in lymphoid tissues is  
623 associated with disease progression in HIV/AIDS. *Blood* **108**, 3808-3817 (2006).
- 624 23. B. Lee, M. Sharron, L. J. Montaner, D. Weissman, R. W. Doms, Quantification of  
625 CD4, CCR5, and CXCR4 levels on lymphocyte subsets, dendritic cells, and  
626 differentially conditioned monocyte-derived macrophages. *Proc Natl Acad Sci U S A*  
627 **96**, 5215-5220 (1999).
- 628 24. K. J. Gellatly *et al.*, scRNA-seq of human vitiligo reveals complex networks of  
629 subclinical immune activation and a role for CCR5 in Treg function. *Sci Transl Med*  
630 **13**, eabd8995 (2021).
- 631 25. P. J. McLaren *et al.*, Polymorphisms of large effect explain the majority of the host  
632 genetic contribution to variation of HIV-1 virus load. *Proc Natl Acad Sci U S A* **112**,  
633 14658-14663 (2015).
- 634 26. R. G. Carroll *et al.*, The role of co-stimulation in regulation of chemokine receptor  
635 expression and HIV-1 infection in primary T lymphocytes. *Semin Immunol* **10**, 195-  
636 202 (1998).
- 637 27. K. Oswald-Richter *et al.*, Identification of a CCR5-expressing T cell subset that is  
638 resistant to R5-tropic HIV infection. *PLoS Pathog* **3**, e58 (2007).
- 639 28. Singer, II *et al.*, CCR5, CXCR4, and CD4 are clustered and closely apposed on  
640 microvilli of human macrophages and T cells. *J Virol* **75**, 3779-3790 (2001).
- 641 29. A. J. Murray, K. J. Kwon, D. L. Farber, R. F. Siliciano, The Latent Reservoir for  
642 HIV-1: How Immunologic Memory and Clonal Expansion Contribute to HIV-1  
643 Persistence. *J Immunol* **197**, 407-417 (2016).
- 644 30. K. Fukada, Y. Sobao, H. Tomiyama, S. Oka, M. Takiguchi, Functional expression of  
645 the chemokine receptor CCR5 on virus epitope-specific memory and effector CD8+  
646 T cells. *J Immunol* **168**, 2225-2232 (2002).

- 647 31. J. E. Kohlmeier *et al.*, The chemokine receptor CCR5 plays a key role in the early  
648 memory CD8<sup>+</sup> T cell response to respiratory virus infections. *Immunity* **29**, 101-113  
649 (2008).
- 650 32. C. Cochain, A. Zerneck, Protective and pathogenic roles of CD8(+) T cells in  
651 atherosclerosis. *Basic Res Cardiol* **111**, 71 (2016).
- 652 33. A. W. Ansari, H. Heiken, M. Moenkemeyer, R. E. Schmidt, Dichotomous effects of  
653 C-C chemokines in HIV-1 pathogenesis. *Immunol Lett* **110**, 1-5 (2007).
- 654 34. L. Statello, C. J. Guo, L. L. Chen, M. Huarte, Gene regulation by long non-coding  
655 RNAs and its biological functions. *Nat Rev Mol Cell Biol* **22**, 96-118 (2021).
- 656 35. G. Hutter *et al.*, The effect of the CCR5-delta32 deletion on global gene expression  
657 considering immune response and inflammation. *J Inflamm (Lond)* **8**, 29 (2011).
- 658 36. Z. R. Shaheen *et al.*, CCR5 is a required signaling receptor for macrophage  
659 expression of inflammatory genes in response to viral double-stranded RNA. *Am J*  
660 *Physiol Regul Integr Comp Physiol* **316**, R525-R534 (2019).
- 661 37. C. Blanpain *et al.*, CCR5 binds multiple CC-chemokines: MCP-3 acts as a natural  
662 antagonist. *Blood* **94**, 1899-1905 (1999).
- 663 38. B. Lee *et al.*, Epitope mapping of CCR5 reveals multiple conformational states and  
664 distinct but overlapping structures involved in chemokine and coreceptor function. *J*  
665 *Biol Chem* **274**, 9617-9626 (1999).
- 666 39. P. Colin *et al.*, CCR5 structural plasticity shapes HIV-1 phenotypic properties. *PLoS*  
667 *Pathog* **14**, e1007432 (2018).
- 668 40. M. D. Rosenblum, S. S. Way, A. K. Abbas, Regulatory T cell memory. *Nat Rev*  
669 *Immunol* **16**, 90-101 (2016).
- 670 41. Z. Zhang *et al.*, IRF7 and RNH1 are modifying factors of HIV-1 reservoirs: a  
671 genome-wide association analysis. *BMC Med* **19**, 282 (2021).
- 672 42. S. Moorlag *et al.*, An integrative genomics approach identifies KDM4 as a modulator  
673 of trained immunity. *Eur J Immunol* 10.1002/eji.202149577 (2021).
- 674 43. A. A. Shabalina, Matrix eQTL: ultra fast eQTL analysis via large matrix operations.  
675 *Bioinformatics* **28**, 1353-1358 (2012).
- 676 44. M. Krzywinski *et al.*, Circos: an information aesthetic for comparative genomics.  
677 *Genome Res* **19**, 1639-1645 (2009).
- 678 45. G. Yu, Using ggtree to Visualize Data on Tree-Like Structures. *Curr Protoc*  
679 *Bioinformatics* **69**, e96 (2020).
- 680 46. R. J. Pruim *et al.*, LocusZoom: regional visualization of genome-wide association  
681 scan results. *Bioinformatics* **26**, 2336-2337 (2010).
- 682 47. R. Aguirre-Gamboa *et al.*, Differential Effects of Environmental and Genetic Factors  
683 on T and B Cell Immune Traits. *Cell Rep* **17**, 2474-2487 (2016).
- 684 48. U. Fahrioglu, M. C. Ergoren, G. Mocan, CCR5-Delta32 gene variant frequency in  
685 the Turkish Cypriot population. *Braz J Microbiol* **51**, 1711-1717 (2020).
- 686 49. W. A. van der Heijden *et al.*, Chronic HIV infection induces transcriptional and  
687 functional reprogramming of innate immune cells. *JCI Insight* **6** (2021).
- 688  
689  
690  
691  
692  
693  
694  
695  
696

697 **Figures and Tables**  
698

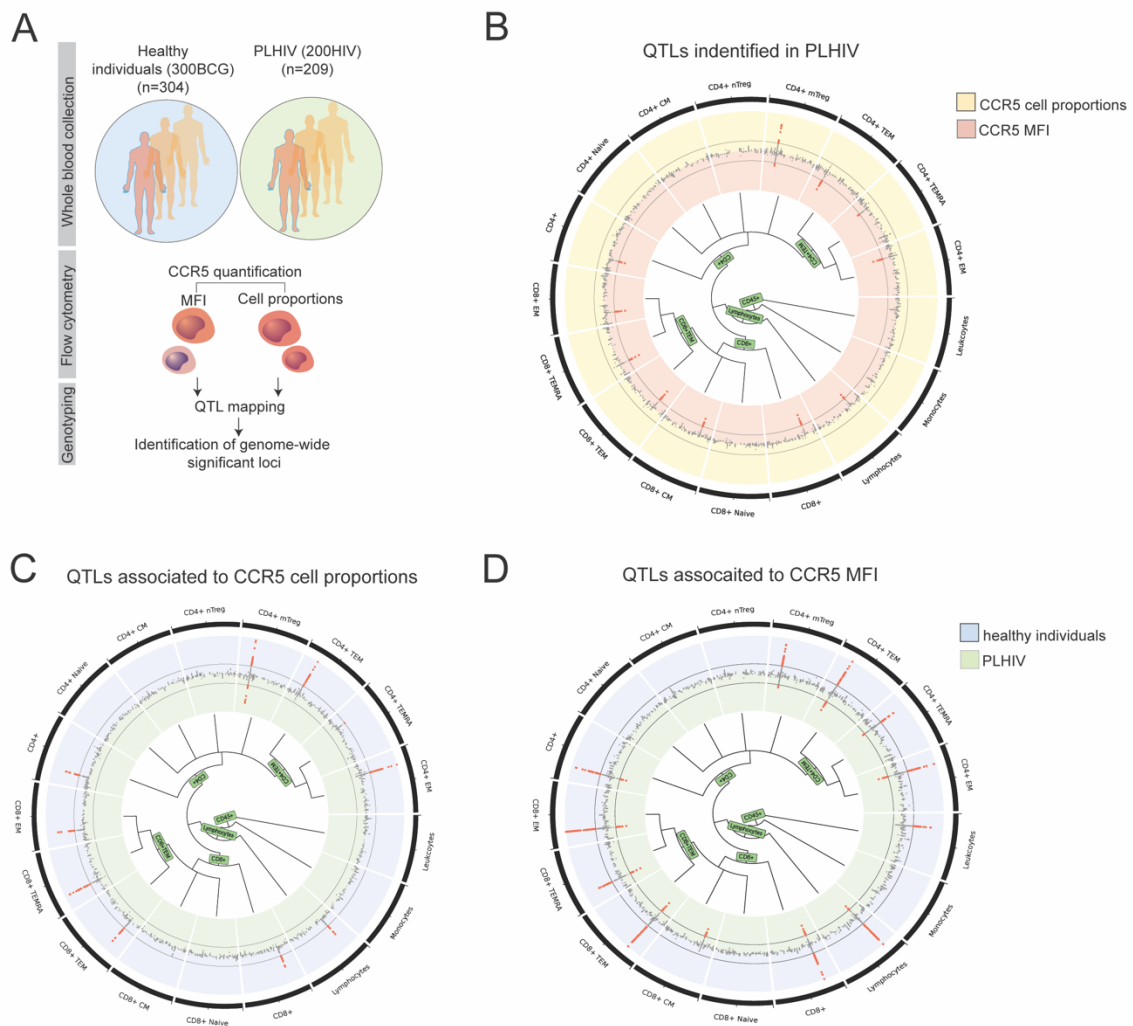

699  
700  
701  
702  
703  
704  
705  
706  
707  
708  
709  
710  
711

**Fig 1.** Genome-wide significant QTLs and their shared associations on multiple immune cell subpopulations. (A) The study design. (B), (C) and (D) are all combined Manhattan plots of multiple immune cell subpopulations (chromosome 3). (B) Includes associations for both CCR5 MFI (red) and cell proportions (CP) (yellow) for PLHIV. (C) Consists of associations for CP from PLHIV (green) and healthy individuals (blue) while (D) shows associations for MFI from PLHIV (green) and healthy individuals (blue). From outer to inner, the first track (black) shows assessed immune cell subpopulation name, where each sector represents one cell types; the second and third tracks include P-value Manhattan plots for each cell type assessed for CP (yellow) and MFI (red) in (B), or PLHIV (green) and healthy individuals (blue) in (C) and (D), respectively; the innermost is hierarchical tree of cell types.



Genetic variations that regulates CCR5 expression in T lymphocytes

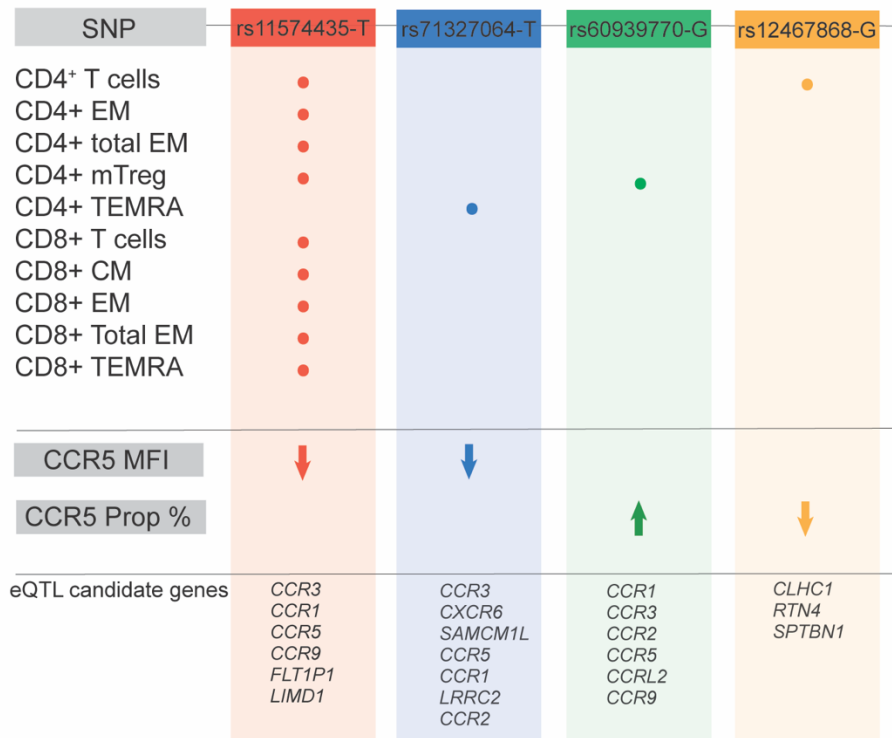

712

713

714

715

716

717

718

719

**Fi 2.** The loci representing the risk variants identified associated with geometric mean fluorescence intensity (MFI) and proportions of CCR5 positive cells or cell (prop %) in both PLHIV and HC. The arrow indicates the directionality of the changes in CCR5 MFI and prop % surface expression in individuals carrying the effect allele of each SNP in the indicated cell-type. Expression QTL results of candidate genes in whole blood of healthy individuals.

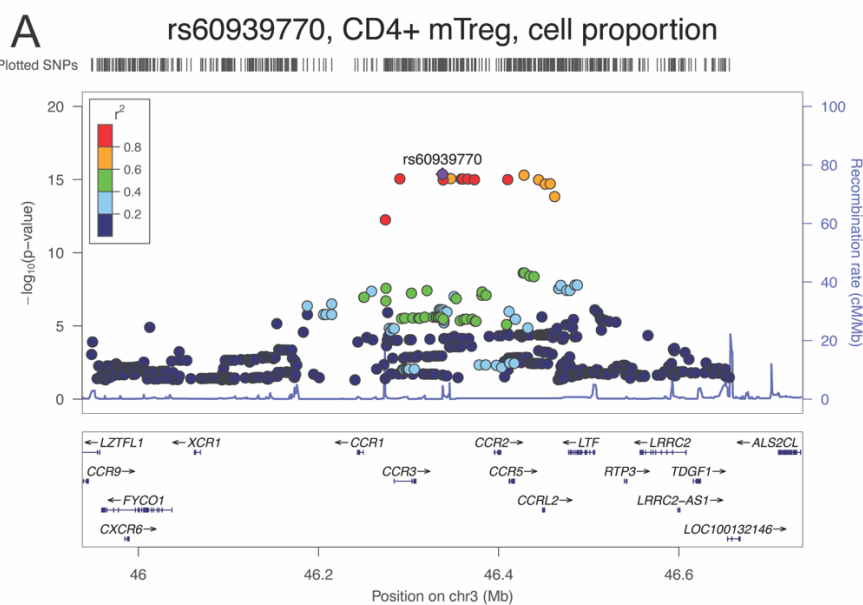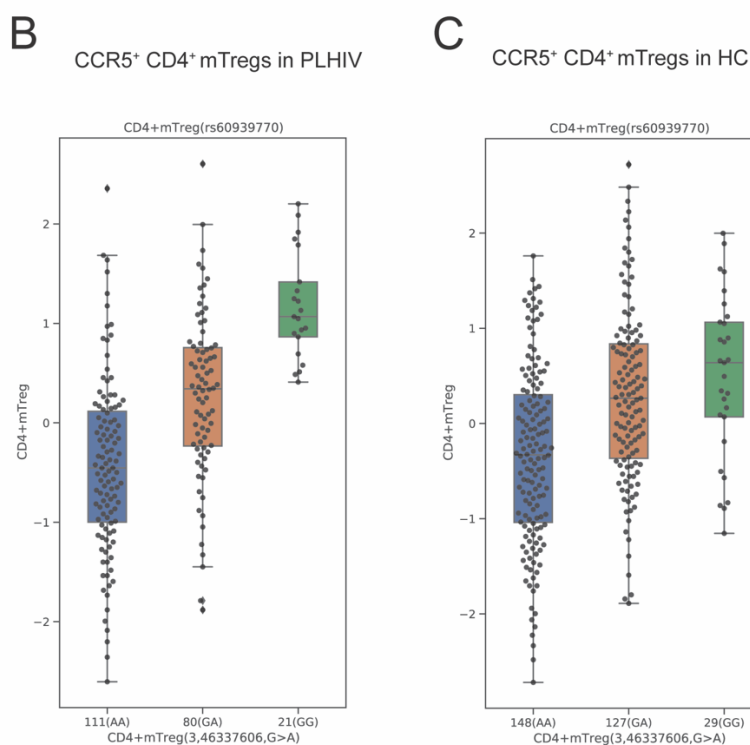

720  
 721  
 722  
 723  
 724  
 725  
 726  
 727  
 728  
 729  
 730

**Fig 3.** Genetic effect of the rs60939770 SNP on CCR5<sup>+</sup>CD4<sup>+</sup> mTreg cells of PLHIV and healthy individuals. (A) Regional plot (LocusZoom) showing the QTL associated with CCR5 cell proportions in CD4<sup>+</sup> mTreg of PLHIV, where the top SNP is rs60939770. (B) and (C) are boxplots of proportions of CCR5 positive CD4<sup>+</sup> mTregs stratified according to the rs60939770 genotypes in PLHIV (P-value =  $4.29 \times 10^{-16}$ ) and HC (P-value =  $3.18 \times 10^{-10}$ ), respectively. Horizontal line in the boxplot, median; ends of the boxes, upper and lower quartiles.

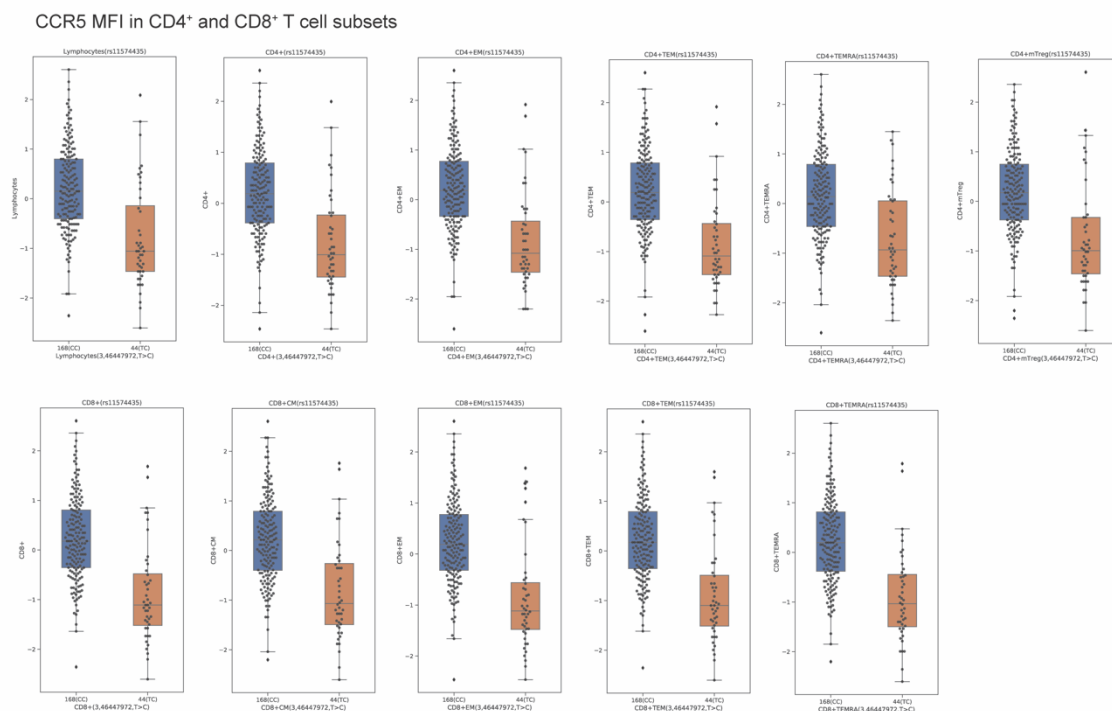

731  
732  
733  
734  
735  
736

**Fig 4.** Genetic effect of rs11574435 SNP on CCR5 MFI in subpopulations of CD4<sup>+</sup> and CD8<sup>+</sup> T cells of PLHIV. Boxplots of CCR5 MFI levels in the different subsets of CD4<sup>+</sup> and CD8<sup>+</sup> T cells stratified according to the rs11574435 genotypes in PLHIV (P-value = < 0.05). Horizontal line in the boxplot, median; ends of the boxes, upper and lower quartiles.

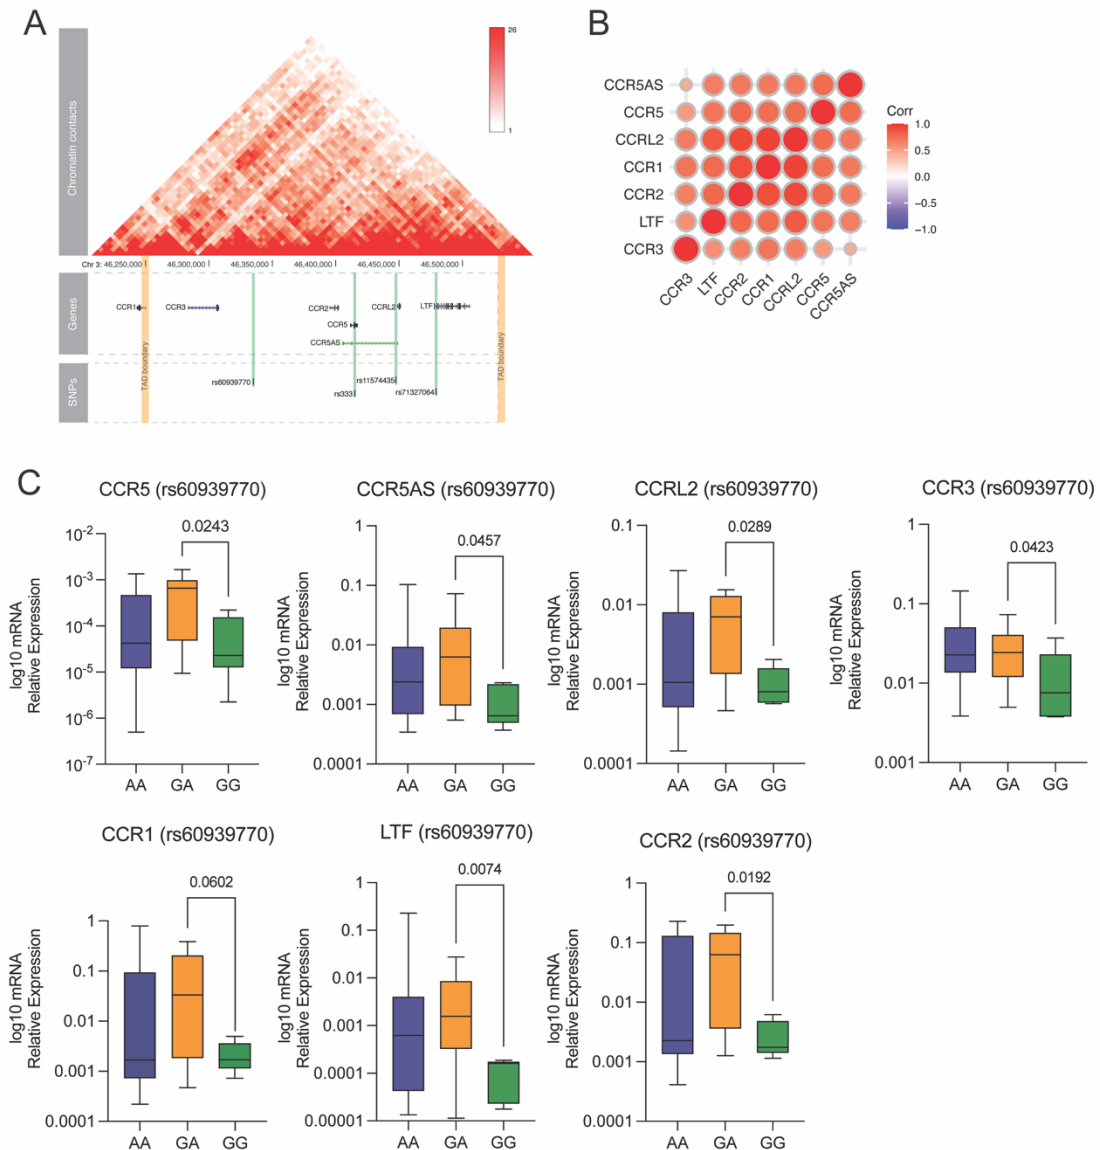

737

738

739

740

741

742

743

744

745

746

747

748

749

**Fig 5.** Chemokine receptors that are part of the *CCR5* gene cluster. (A) Topologically associating domain (TAD) of *CCR5* locus. (B) Spearman's correlation as the measure of similarities between the pattern mRNA expression of *CCR1*, *CCR3*, *CCR2*, *CCRL2*, *LTF*, *CCR5* and *CCR5AS* assessed by RT-PCR. Red indicates a strong positive correlation, whereas blue indicates a strong negative correlation (n= 58 PLHIV). (C) mRNA levels of *CCR1*, *CCR3*, *CCR2*, *CCRL2*, *LTF*, *CCR5* and *CCR5AS* were determined by RT-PCR and the values were stratified based on rs60939770 genotypes. Data were analysed using Mann-Whitney U-test (P-value < 0.05). Horizontal line in the boxplot, median; ends of the boxes, upper and lower quartiles.

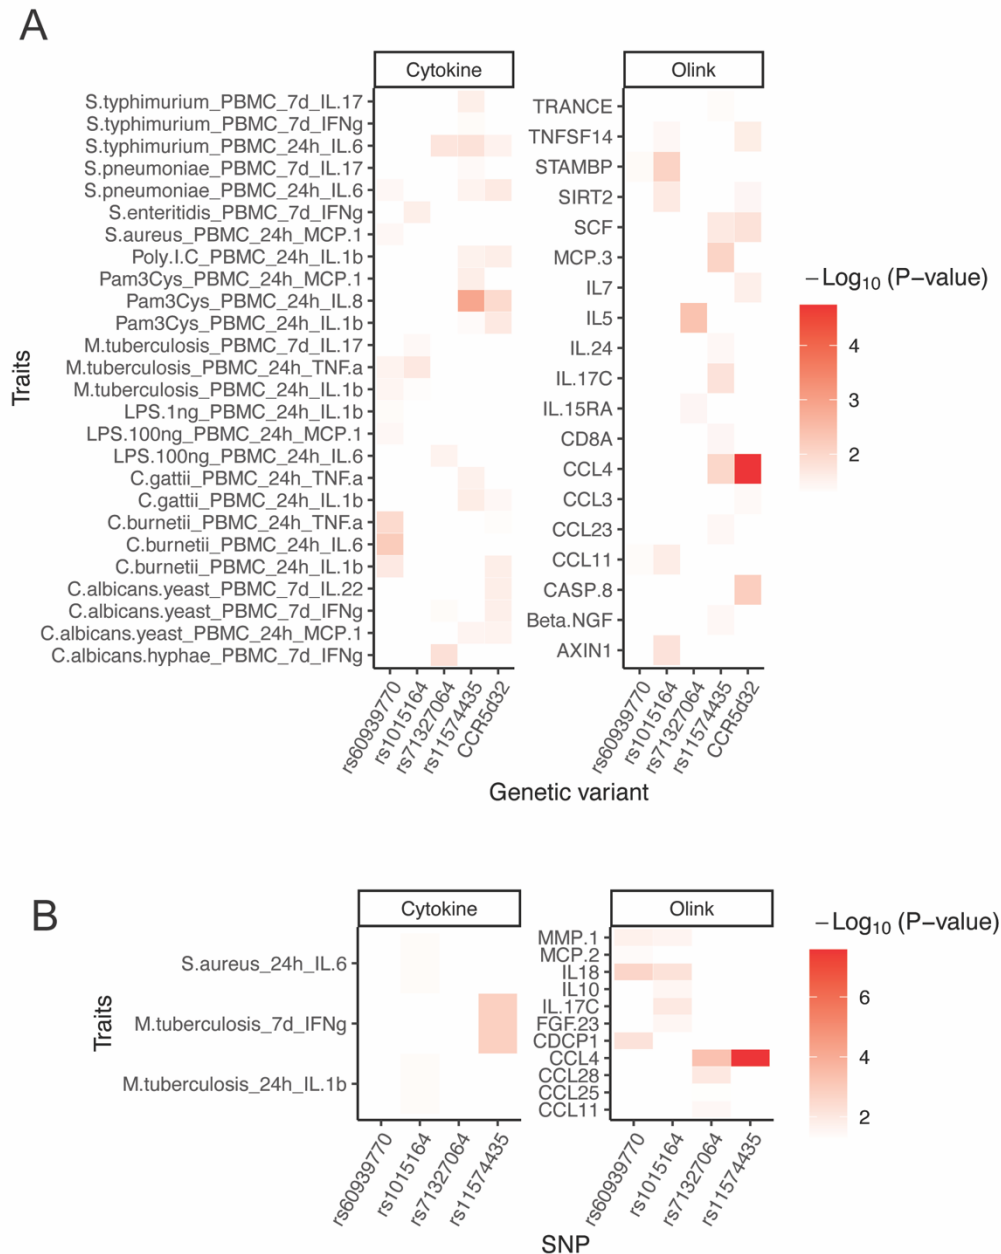

750  
751  
752  
753  
754  
755  
756  
757  
758  
759  
760  
761  
762  
763  
764

765 **Supporting information**

766

767 **Host genetic variants regulates CCR5 expression on immune cells: a study in people**  
768 **living with HIV and healthy controls**

769 Jéssica C. dos Santos<sup>a,1,\*</sup>, Zhenhua Zhang<sup>b,h,i,1</sup>, Louise E. van Eekeren<sup>a</sup>, Ezio T. Fok<sup>c</sup>, Nadira  
770 Vadaq<sup>a</sup>, Lisa van de Wijer<sup>a</sup>, Wouter A. van der Heijden<sup>a</sup>, Valerie A. C. M. Koeken<sup>a,h,i</sup>, Hans  
771 J.P.M. Koenen<sup>d</sup>, Musa Mhlanga<sup>c,e,f</sup>, Mihai G. Netea<sup>a,g</sup>, André J. van der Ven<sup>a</sup>, Yang Li<sup>a,h,i</sup>

772

773

774

775

776

777

778

779

780

781

782

783

784

785

786

787

788

789

790

791

792

793

794

795

796

797

798

799

800

801

802

803

804

805

806

807

808

809 **S1 Table.** Genomic-wide significant CCR5 QTL SNPs in PLHIV. Abbreviations: CM =  
 810 central memory, EM = effector memory cells (CD45RA-CCR7-), TEMRA = effector  
 811 memory cells expressing CD45RA (CD45RA+CCR7-), and TEM = total effector memory  
 812 (i.e. the total pool of effector memory cells).

| Trait      | SNP ID       | Chromosome: bp-Effect allele (GRCh37) | AF*           | Proxy SNP (R <sup>2</sup> )                         | eQTL gene (P<5e <sup>-8</sup> )**            | Effect on (CCR5)*** | P-value (PLHIV) | Beta (PLHIV) | P-value (HC) | Beta (HC)        | Cell type        |
|------------|--------------|---------------------------------------|---------------|-----------------------------------------------------|----------------------------------------------|---------------------|-----------------|--------------|--------------|------------------|------------------|
| MFI        | rs7603982    | 2:50682596-C                          | 0.1170        | <NA>                                                | <NA>                                         | <NA>                | 2.28E-08        | 0.806        | <NA>         | <NA>             | CD45+ cells      |
|            | rs11574435   | 3:46447972-T                          | 0.1006        | rs333 (0.842)                                       | <i>CCR3, CCR1, CCR5, CCR9, FLT1P1, LIMD1</i> | +                   | 9.32E-11        | -1.081       | 5.78E-16     | -1.012           | CD4+ cells       |
|            |              |                                       |               |                                                     |                                              |                     | 8.64E-13        | -1.184       | 1.40E-18     | -1.088           | CD8+ cells       |
|            |              |                                       |               |                                                     |                                              |                     | 1.78E-11        | -1.117       | 1.14E-05     | -0.557           | CM CD8+ cells    |
|            |              |                                       |               |                                                     |                                              |                     | 5.90E-13        | -1.191       | 1.28E-24     | -1.241           | TEM CD8+ cells   |
|            |              |                                       |               |                                                     |                                              |                     | 4.04E-10        | -1.050       | 2.31E-23     | -1.213           | Lymphocyte       |
|            |              |                                       |               |                                                     |                                              |                     | 1.43E-12        | -1.168       | 1.28E-24     | -1.241           | EM CD8+ cells    |
|            |              |                                       |               |                                                     |                                              |                     | 4.07E-12        | -1.147       | 1.37E-16     | -1.031           | EM CD4+ cells    |
|            |              |                                       |               |                                                     |                                              |                     | 6.49E-13        | -1.187       | 1.95E-12     | -0.882           | TEMRA CD8+ cells |
|            |              |                                       |               |                                                     |                                              |                     | 2.01E-12        | -1.163       | 3.73E-18     | -1.077           | TEM CD4+ cells   |
| 2.91E-09   | -0.999       | 6.91E-16                              | -1.004        | <i>mTreg</i>                                        |                                              |                     |                 |              |              |                  |                  |
| rs71327064 | 3:46478866-T | 0.2507                                | rs333 (0.338) | <i>CCR3, CXCR6, SACM1L, CCR5, CCR1, LRRC2, CCR2</i> | +                                            | 6.22E-09            | -0.667          | 1.87E-10     | -0.632       | TEMRA CD4+ cells |                  |
| CP         | rs60939770   | 3:46337606-G                          | 0.2815        | rs1015164 (0.682)                                   | <i>CCR1, CCR3, CCR2, CCR5, CCR12, CCR9</i>   | +                   | 4.30E-16        | 0.784        | 3.18E-10     | 0.534            | <i>mTreg</i>     |
|            | rs12467868   | 2:55460833-G                          | 0.4186        | <NA>                                                | <i>CLHC1, RTN4, SPTBN1</i>                   | <NA>                | 4.07E-08        | -0.524       | <NA>         | <NA>             | CD4+ cells       |

813

814 \* Allele frequency (AF) of the effect allele in ERU cohort from 1000 Genome project  
 815 phase 3.

816 \*\* eQTL gene identified in eQTLGen database (Release 2019-12-23).

817 \*\*\* The sign represents the direction of the assessed allele affecting *CCR5* expression in  
 818 whole blood (eQTLGen database Release 2019-12-23).

819

820 **S2 Table.** Genomic-wide significant CCR5 QTL SNPs in healthy individuals.  
 821 Abbreviations: CM = central memory, EM = effector memory cells (CD45RA-CCR7-),  
 822 TEMRA = effector memory cells expressing CD45RA (CD45RA+CCR7-), and TEM = total  
 823 effector memory (i.e. the total pool of effector memory cells).

| SNP ID      | Effect allele  | Trait | P-value  | Beta   | Cell type        |
|-------------|----------------|-------|----------|--------|------------------|
| rs113010081 | 3:46457412-C   | MFI   | 1.64E-15 | -1.039 | CD45+ cells      |
|             |                |       | 6.96E-19 | -1.142 | CD4+ cells       |
|             |                |       | 2.24E-27 | -1.355 | Lymphocytes      |
|             |                |       | 9.47E-34 | -1.474 | EM CD8+ cells    |
|             |                |       | 6.45E-20 | -1.171 | EM CD4+ cells    |
|             |                |       | 1.19E-21 | -1.217 | TEM CD4+ cells   |
|             |                | CP    | 4.25E-13 | -0.949 | Lymphocytes      |
|             |                |       | 4.85E-08 | -0.721 | TEMRA CD4+ cells |
| rs113341849 | 3:46384204-A   | MFI   | 2.07E-22 | -1.217 | CD8+ cells       |
|             |                |       | 1.49E-29 | -1.376 | TEM CD8+ cells   |
|             |                |       | 2.87E-14 | -0.969 | TEMRA CD8+ cells |
|             |                |       | 7.21E-15 | -1.001 | TEMRA CD4+ cells |
|             |                |       | 8.07E-18 | -1.088 | mTreg            |
|             |                | CP    | 2.68E-14 | -0.965 | CD4+ cells       |
|             |                |       | 2.42E-13 | -0.907 | CD8+ cells       |
|             |                |       | 6.30E-16 | -1.036 | TEM CD8+ cells   |
|             |                |       | 1.41E-15 | -1.024 | EM CD8+ cells    |
|             |                |       | 3.82E-22 | -1.202 | EM CD4+ cells    |
|             |                |       | 1.55E-18 | -1.087 | TEMRA CD8+ cells |
|             |                |       | 5.45E-22 | -1.196 | TEM CD4+ cells   |
|             |                |       | 7.36E-20 | -1.149 | mTreg            |
| rs9670662   | 13:111098701-A |       | 2.60E-08 | 0.429  | CM CD4+ cells    |

824  
 825  
 826  
 827  
 828  
 829  
 830  
 831  
 832  
 833  
 834



835

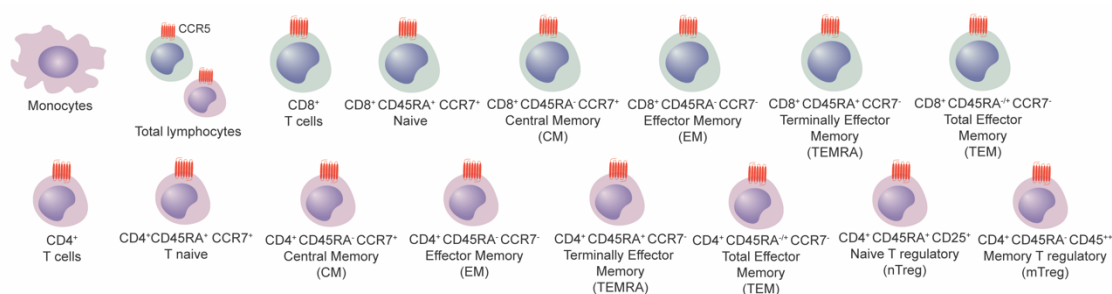

836

837

**S1 Fig.** Circulating immune cells subpopulations in which CCR5 surface expression was assessed by flow cytometry.

838

839

840

841

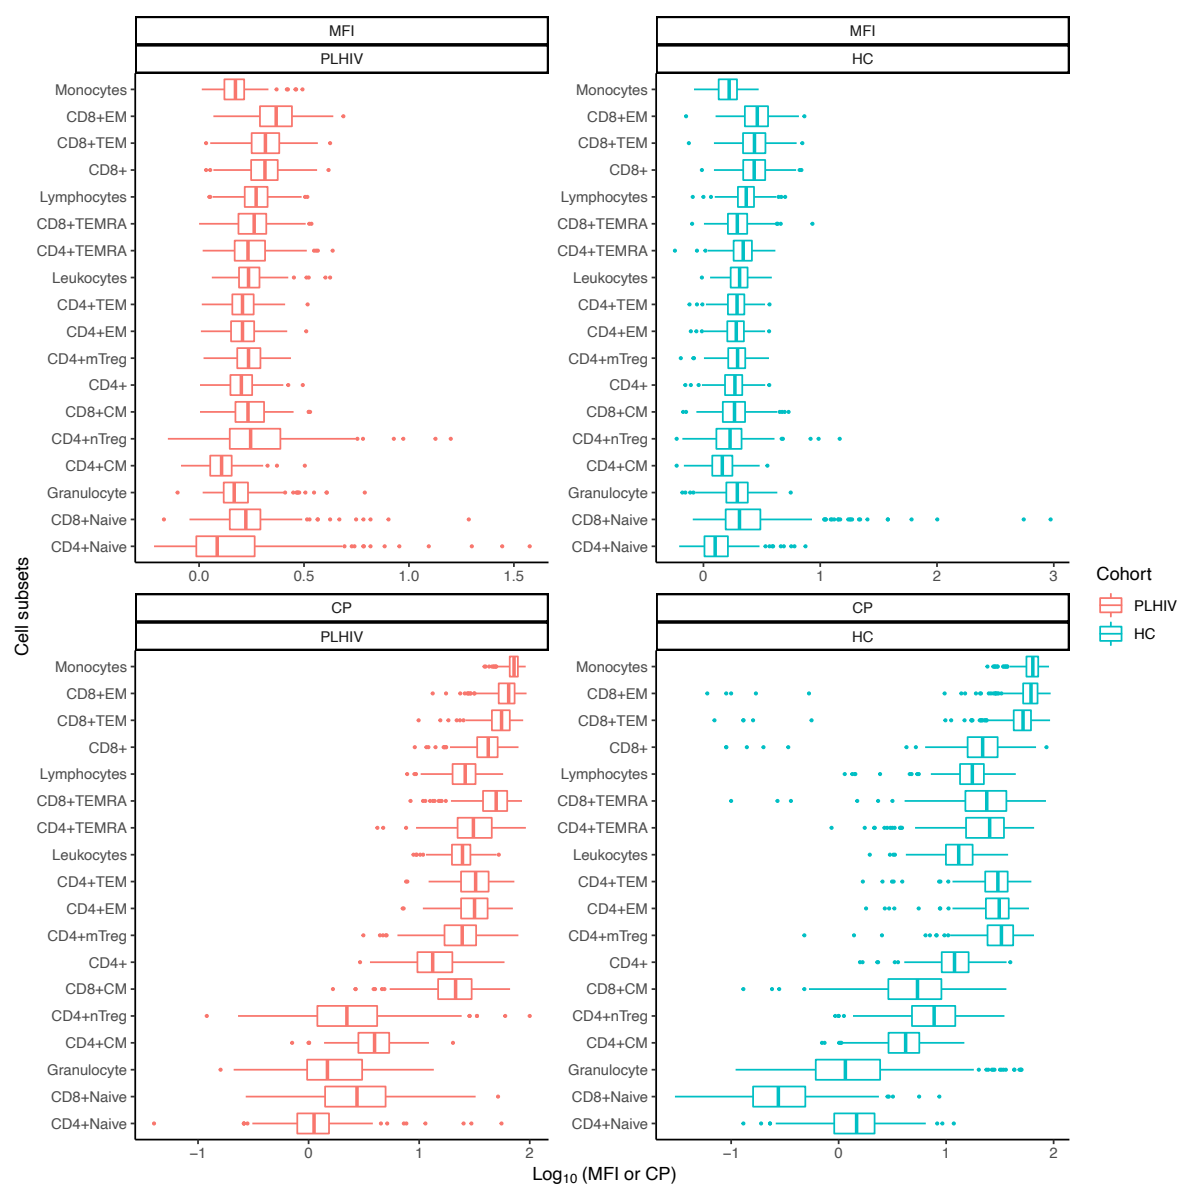

842

843

**S2 Fig.** The distribution of CCR5 MFI and cell proportions (CP) measured in PLHIV (200HIV) and HC (300BCG).

844

845

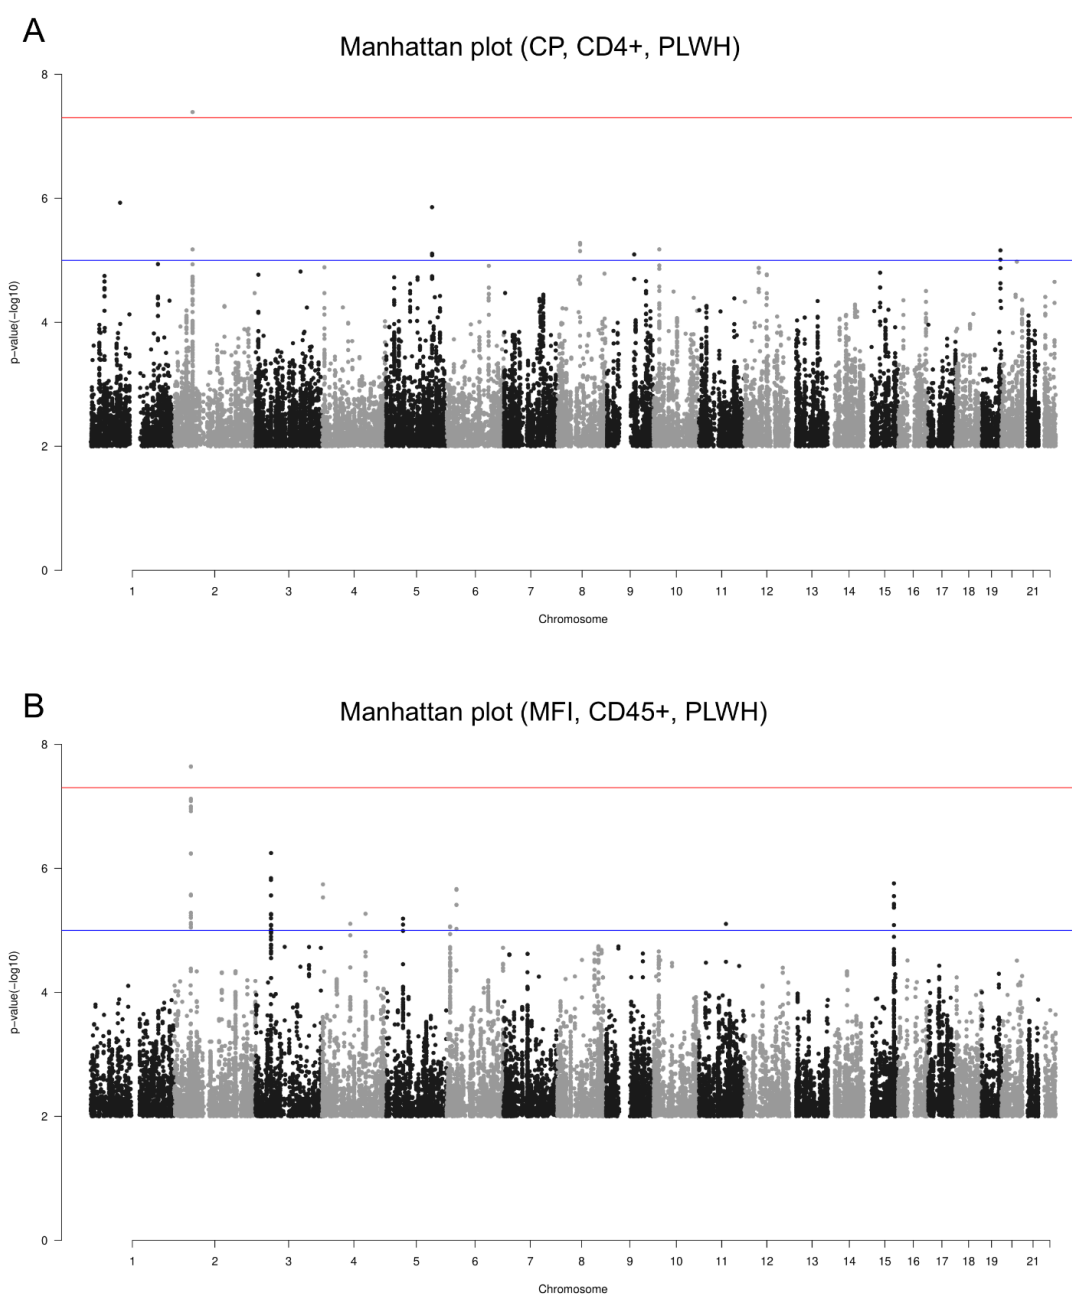

846

847 **S3 Fig.** Manhattan plots shows two loci identified for CCR5 cell proportions in CD4<sup>+</sup> cells

848 (A) and for CCR5 MFI in CD45<sup>+</sup> cells (B). Red lines correspond to a genome-wide significant

849 threshold, whereas blue lines a represent suggestive threshold. Genomic variants are

850 shown on the x-axis and y axis indicate the association between each variant and CD4<sup>+</sup>

851 cells (A) and MFI in CD45<sup>+</sup> cells (B), respectively.

852

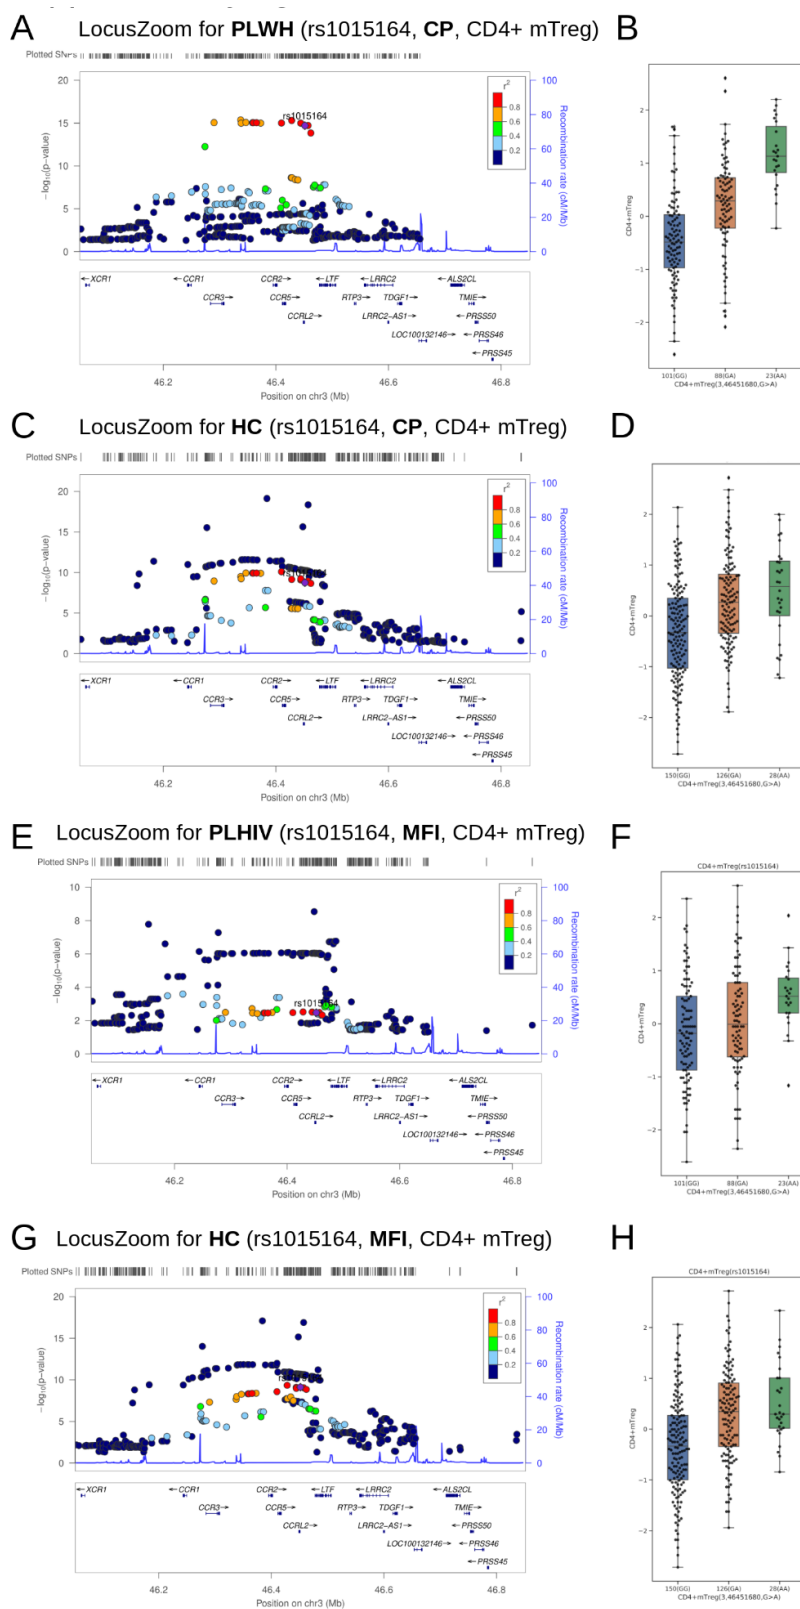

853

854

855 **S4 Fig.** rs1015164 is associated with CCR5 cell proportions (CP) and MFI in mTreg cells  
 856 from PLHIV and HC. (A) and (C) are regional plots (LocusZoom) showing rs1015164  
 857 associated with CP in CD4<sup>+</sup> mTreg of PLHIV and HC, respectively. (B) and (D) are boxplots  
 858 of CP in CD4<sup>+</sup> mTregs stratified according to the genotypes of rs1015164 in PLHIV and HC,  
 859 respectively. (E) and (G) are regional plots (LocusZoom) showing rs1015164 associated

860 with MFI in CD4<sup>+</sup> mTreg of PLHIV and HC, respectively. (F) and (H) are boxplots of MFI in  
 861 CD4<sup>+</sup> mTregs stratified according to the genotypes of rs1015164 in PLHIV and HC,  
 862 respectively.  
 863

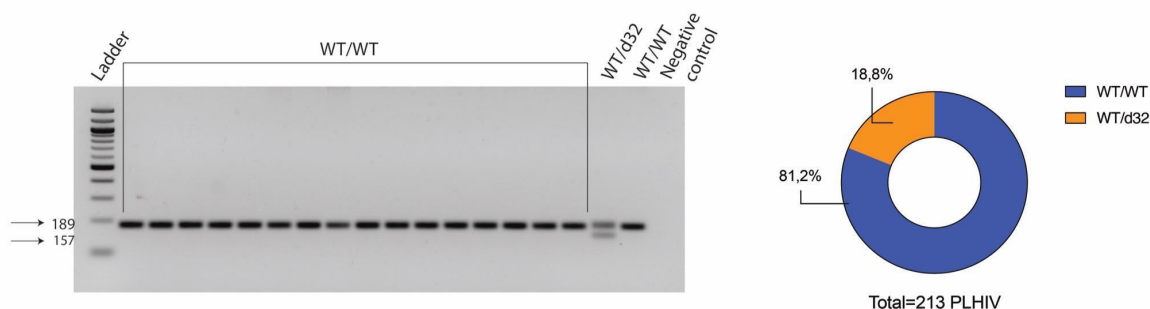

864  
 865 **S5 Fig.** Schematic representation of how *CCR5d32* were assessed in individuals part of the  
 866 200HIV pilot study. WT allele is expected at 189bp and the *d32* is expected at 157bp. After  
 867 the ladder in lane 1, lanes 2-16 represents homozygous wild-type genotype (fragment of  
 868 189bp), lane 17 represents a heterozygous genotype (fragments of 189bp and 157bp), lane  
 869 18 represents homozygous wild-type genotype and lane 19 is the negative control for PCR  
 870 reaction. Part of a whole plot showing the distribution of WT/WT and WT/d32 in the entire  
 871 cohort of HIV patients.  
 872

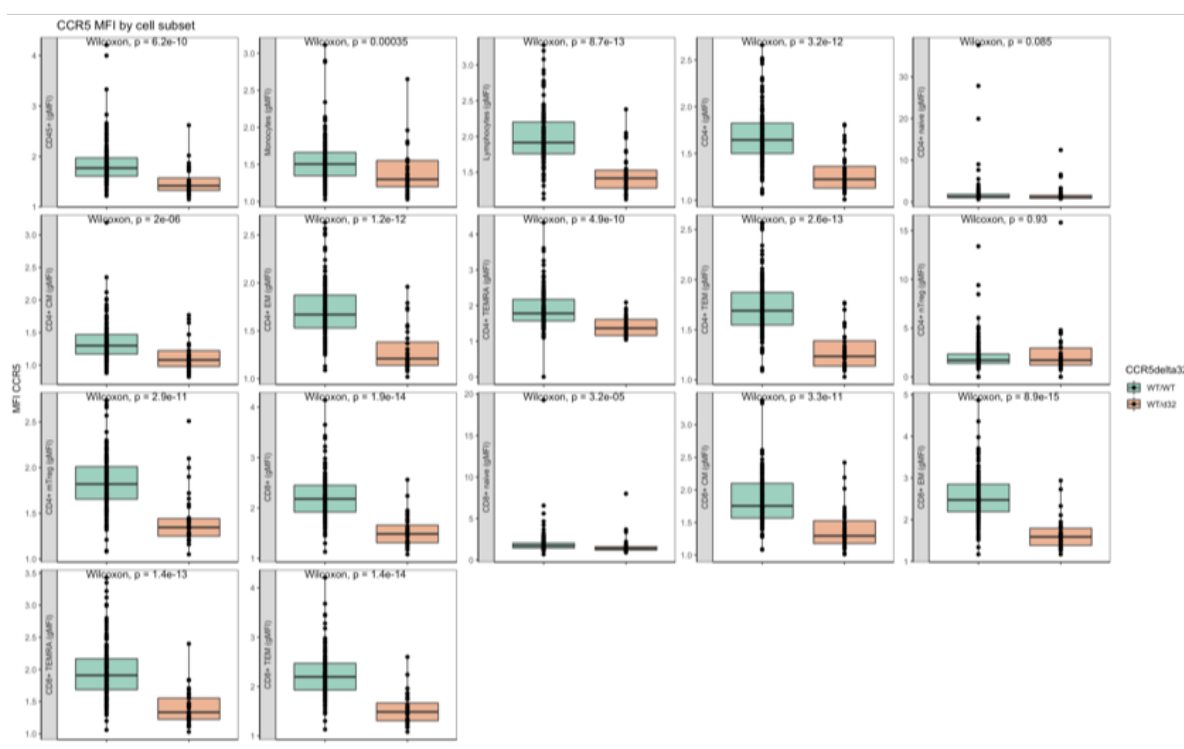

873  
 874 **S6 Fig.** CCR5 geometric mean of fluorescence intensity (MFI) stratified based on *CCR5*  
 875 *delta32* (WT/WT= green, WT/d32= orange; all PLHIV). Data were analysed using Wilcoxon  
 876 matched pairs signed-rank test (P-value < 0.05).

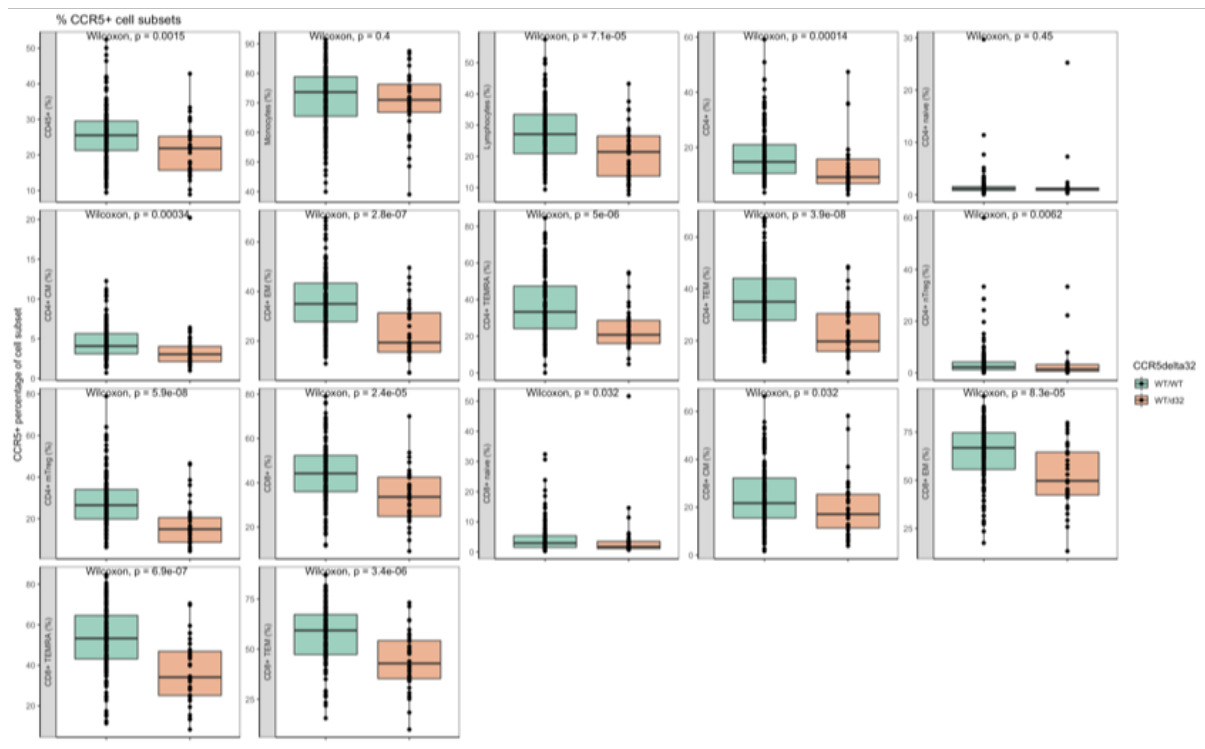

877  
878  
879  
880  
881  
882

**S7 Fig.** Percentages of CCR5 positive cells (cell proportions) stratified based on *CCR5 delta32* (WT/WT= green, WT/d32= orange; all PLHIV). Data were analysed using Wilcoxon matched pairs signed-rank test (P-value < 0.05).

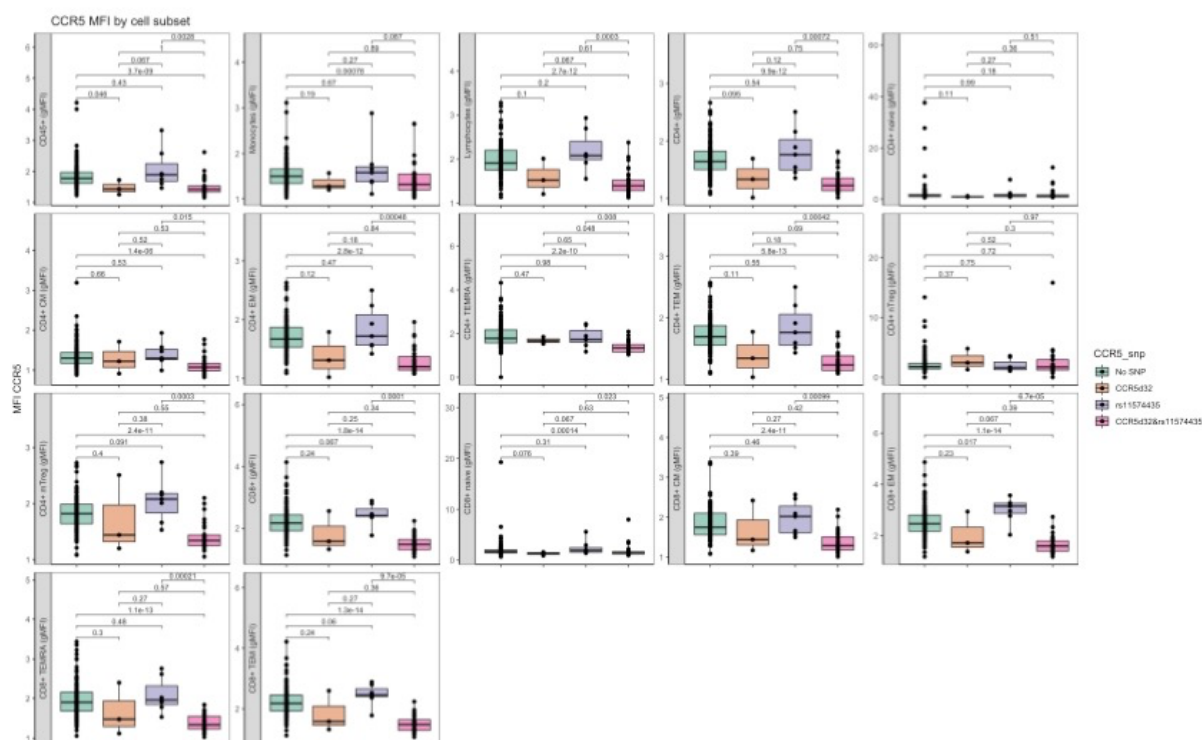

883  
884  
885  
886  
887  
888

**S8 Fig.** CCR5 MFI stratified based on individuals carrying no SNP (green), *CCR5 delta32* (orange) or rs11574435 (purple) only and both *CCR5 delta32/rs11574435* together (pink). Data referred to PLHIV analysed using Wilcoxon matched pairs signed-rank test (P-value < 0.05).

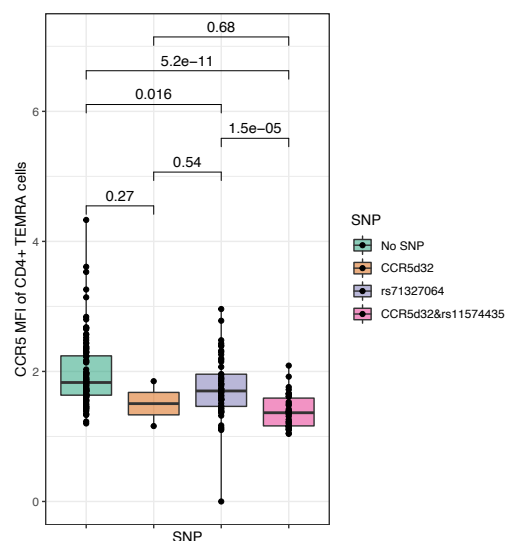

889  
890  
891  
892  
893  
894

**S9 Fig.** CCR5 MFI in CD4<sup>+</sup> TEMRA cells stratified based on individuals carrying no SNP (green), *CCR5 delta32* (orange) or rs71327064 (purple) only and both *CCR5 delta32/rs71327064* together (pink). Data referred to PLHIV analysed using Wilcoxon matched pairs signed-rank test (P-value < 0.05).

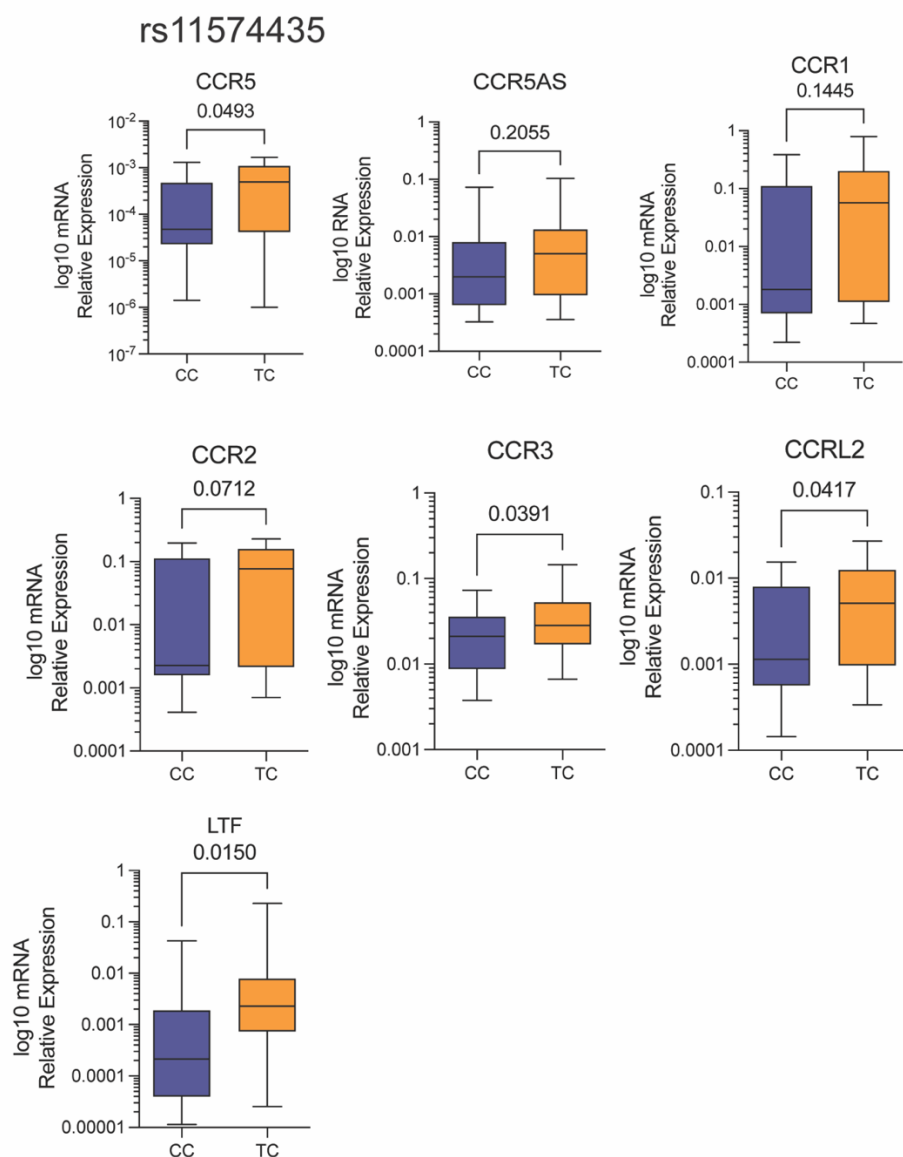

895  
896  
897  
898  
899  
900  
901  
902  
903

**S10 Fig.** mRNA levels of *CCR1*, *CCR3*, *CCR2*, *CCRL2*, *LTF*, *CCR5* and *CCR5AS* were determined by RT-PCR and the values were stratified based on rs11574435. Data were analysed using Mann-Whitney U-test (P-value < 0.05).

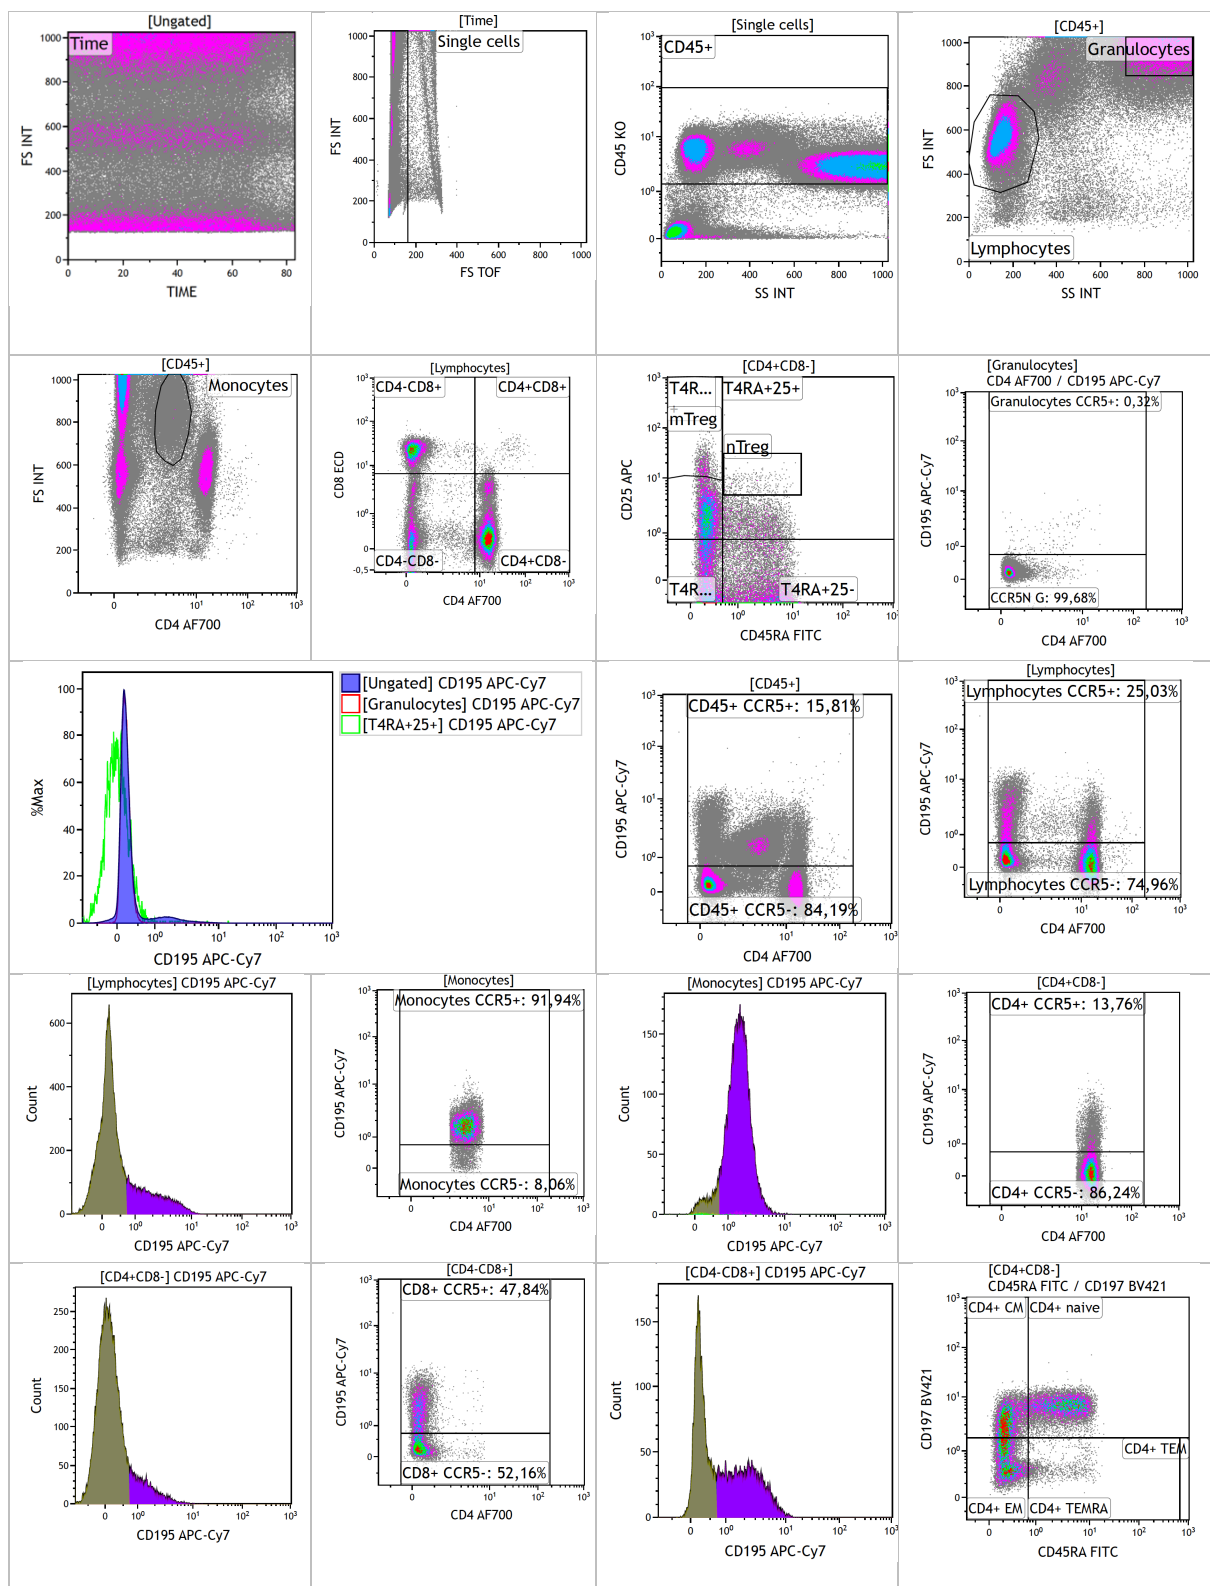



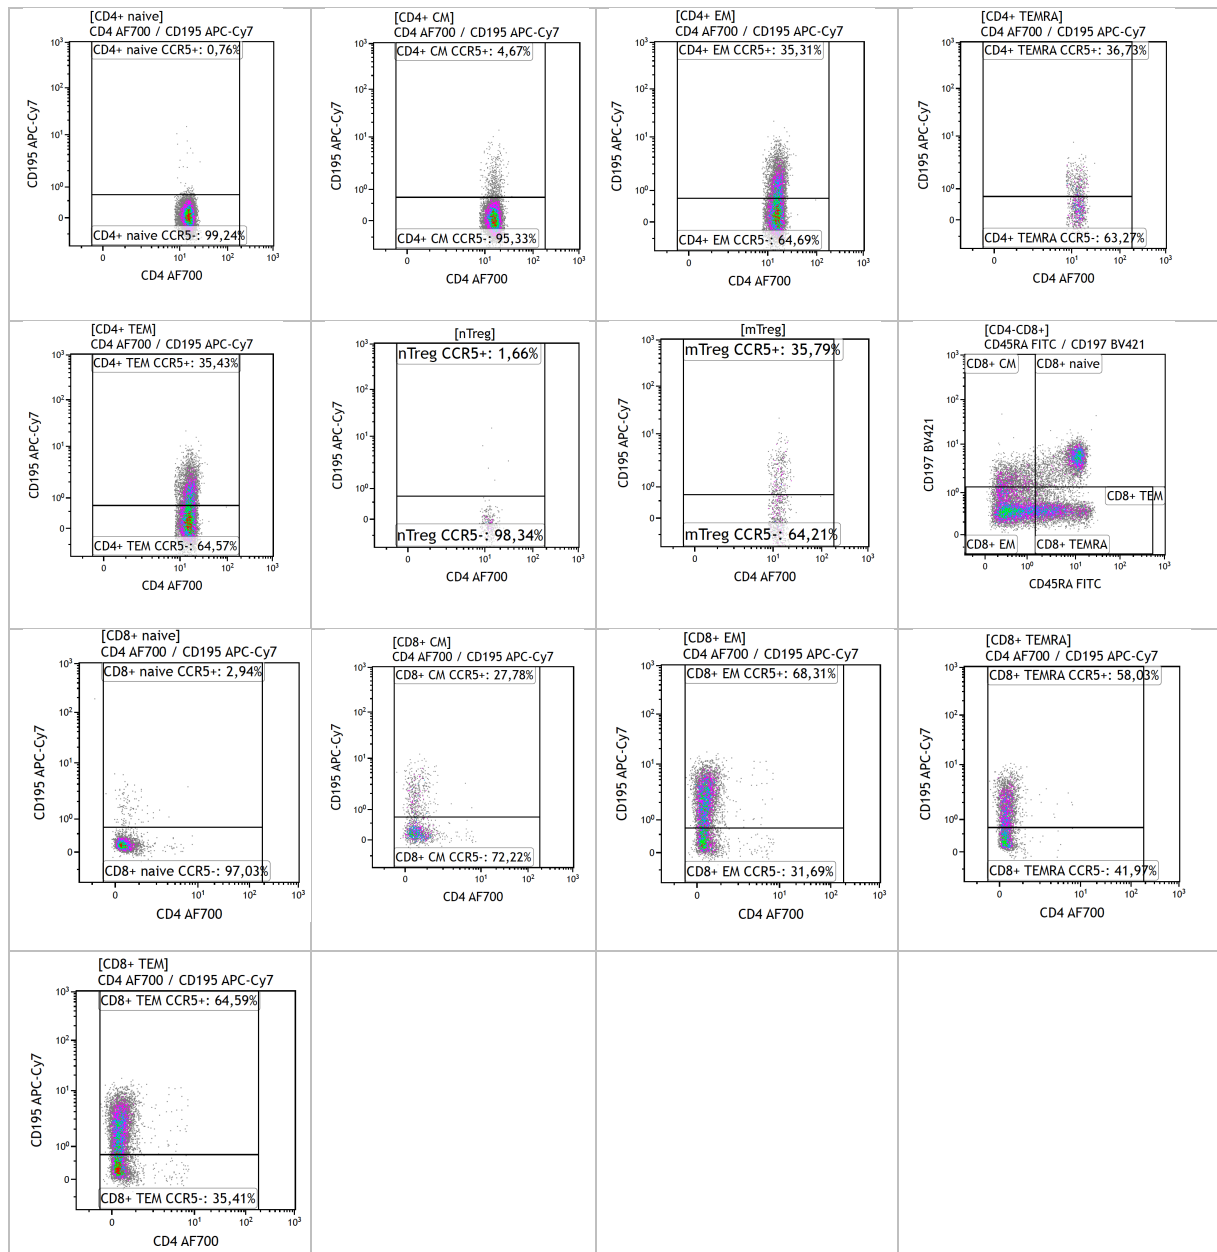

904 **S11 Fig.** Example of the gating strategy. CD45+ cells were identified by gating on live and  
 905 single cells and subsequently on CD45+ cells. Within the CD45+ cells, lymphocytes and  
 906 monocytes were identified by granularity (side scatter) and size (forward scatter).  
 907 Lymphocytes were further classified into different subsets of CD4+(CD8-) T cells and (CD4-  
 908 ) CD8+ T cells. CD4+ cells and CD8+ were classified as being naïve (CD45RA+CCR7+),  
 909 central memory (CM, CD45RA-CCR7+), effector memory cells (EM, CD45RA-CCR7-),  
 910 effector memory cells expressing CD45RA (TEMRA, CD45RA+CCR7-) and the total pool  
 911 of effector memory cells (TEM, CD45RA-/CCR7-). CD4+ naive regulatory (nTreg,  
 912 CD45RA+CD25+) and CD4+ memory regulatory (mTreg, CD45RA-CD45++) cell subsets  
 913 were identified within the subset of CD4+CD8- T cells.

914  
 915

916

917

918 **Methods**

919

920 Live and single cells were selected first. Leukocytes were identified using CD45.  
 921 Lymphocytes and monocytes were identified by granularity and size. Lymphocytes were  
 922 further characterized using CD4, CD8, CD45RA and CCR7 to identify CD4+ cells and CD8+  
 923 naïve (CD45RA+CCR7+), central memory (CM, CD45RA-CCR7+), effector memory cells  
 924 (EM, CD45RA-CCR7-), effector memory cells expressing CD45RA (TEMRA,  
 925 CD45RA+CCR7-) and the total pool of effector memory cells (TEM, CD45RA-/+CCR7-) (41,  
 926 42). In addition, CD4+ naive regulatory (nTreg, CD45RA+CD25+) and CD4+ memory  
 927 regulatory (mTreg, CD45RA-CD25++) cell subsets were identified. Gates for CCR5 were  
 928 set using an internal negative control (granulocytes) and fluorescence minus one controls.  
 929 The regions that identified CCR5- cell populations in granulocytes were used to distinguish  
 930 between CCR5- and CCR5+ cell populations in other cell types as well. The percentage of  
 931 CCR5+ cells (%) and CCR5 geometric mean fluorescence intensity (MFI) were assessed  
 932 on all identified cell types.

933

934 **S3 Table.** Summary of the antibody clones and the fluorochrome conjugates used for the  
 935 fluorescent staining mixes. mAb = monoclonal antibody.

| Fluorochrome | FITC    | ECD          | APC  | AF700       | APC-Cy7      | BV421        | KO      |
|--------------|---------|--------------|------|-------------|--------------|--------------|---------|
| mAb          | CD45RA  | CD8          | CD25 | CD4         | CD195 (CCR5) | CD197 (CCR7) | CD45    |
| Clone        | ALB11   | SFCI21Thy2D3 | 2A3  | RPA-T4      | 2D7          | G043H7       | J33     |
| Supplier     | Coulter | Coulter      | BD   | eBioscience | BD           | Biolegend    | Coulter |

936

937

938

939

940

941

942

943

944

945

946

947 **S4 Table.** Primers sequences used in the qPCR and *CCR5d32* PCR  
948

| Gene          |         | Sequence                  |
|---------------|---------|---------------------------|
| <i>CCR5</i>   | Forward | GTCCCTTCTGGGCTCACTAT      |
| <i>CCR5</i>   | Reverse | CCCTGTCAAGAGTTGACACATTGTA |
| <i>CCR5AS</i> | Forward | TCCTGGTCCCCGTATTGAAT      |
| <i>CCR5AS</i> | Reverse | AGGAAGGTATGTGGTGACCA      |
| <i>CCR1</i>   | Forward | CACAGGCTTGTACAGCGAGA      |
| <i>CCR1</i>   | Reverse | CTGCAGGTGTGGTGAGTGAA      |
| <i>CCR3</i>   | Forward | AGCAGAGCCGGA ACTCTCTA     |
| <i>CCR3</i>   | Reverse | GATGATGAGTACGCTGCCCA      |
| <i>CCRL2</i>  | Forward | TTGGACTGTACTTCGTGGGC      |
| <i>CCRL2</i>  | Reverse | TGTTACCCATGCCAGGACAC      |
| <i>CCR2</i>   | Forward | TACCAACGAGAGCGGTGAAG      |
| <i>CCR2</i>   | Reverse | TGAACACCAGCGAGTAGAGC      |
| <i>LTF</i>    | Forward | CTATTATGCCGTGGCTGTGG      |
| <i>LTF</i>    | Reverse | TTATCTGCACCGGGAACACA      |
| <i>RPL37A</i> | Forward | ATTGAAATCAGCCAGCAGC       |
| <i>RPL37A</i> | Reverse | AGGAACCACAGTGCCAGAT       |

|                |         |                          |
|----------------|---------|--------------------------|
| <i>CCR5d32</i> | Forward | CAAAAAGAAGGTCTTCATTACACC |
| <i>CCR5d32</i> | Reverse | CCTGTGCCTCTTCTTCATTTTCG  |

949

950
